# Supplementary material for: Mathematical characterization of population dynamics in breast cancer cells treated with doxorubicin
Source: bioRxiv or medRxiv preprint supplement (doi:10.1101/2021.12.01.470781), 2021-12-03
Supplement: Supplementary file [file media-1.pdf]

## Supplementary Information

---

### **Mathematical characterization of population dynamics in breast cancer cells treated with doxorubicin**

Emily Y. Yang<sup>1</sup>, Grant R. Howard<sup>2</sup>, Amy Brock<sup>2-4</sup>, Thomas E. Yankeelov<sup>1-3,5-7</sup>, Guillermo Lorenzo<sup>1,8,\*</sup>

<sup>1</sup>Oden Institute for Computational Engineering and Sciences, The University of Texas at Austin, Austin, TX, USA

<sup>2</sup>Department of Biomedical Engineering, The University of Texas at Austin, Austin, TX, USA

<sup>3</sup>Livestrong Cancer Institutes, Dell Medical School, The University of Texas at Austin, Austin, TX, USA

<sup>4</sup>Interdisciplinary Life Sciences Program, The University of Texas at Austin, Austin, TX, USA

<sup>5</sup>Department of Diagnostic Medicine, The University of Texas at Austin, Austin, Austin, TX, USA

<sup>6</sup>Department of Oncology, The University of Texas at Austin, Austin, Austin, TX, USA

<sup>7</sup>Department of Imaging Physics, The University of Texas MD Anderson Cancer Center, Houston, TX, USA

<sup>8</sup>Department of Civil Engineering and Architecture, University of Pavia, Pavia, Italy

#### \*Corresponding author

Oden Institute for Computational Engineering and Sciences

The University of Texas at Austin

201 E 24th St, 78712-1229 Austin TX, USA

Email: [guillermo.lorenzo@utexas.edu](mailto:guillermo.lorenzo@utexas.edu), [guillermo.lorenzo@unipv.it](mailto:guillermo.lorenzo@unipv.it)

## **Abbreviations**

NRMSE: Normalized root mean square error

$R^2$ : Coefficient of determination

PCC: Pearson correlation coefficient

CCC: Concordance correlation coefficient

# Table of Contents

|                                                                                                    |           |
|----------------------------------------------------------------------------------------------------|-----------|
| <b>Supplementary Tables</b> .....                                                                  | <b>1</b>  |
| <b>Mathematical Model</b> .....                                                                    | <b>1</b>  |
| S1. Definition and units of the model parameters.....                                              | 1         |
| <b>Experiment 1: Varying doxorubicin concentration</b> .....                                       | <b>2</b>  |
| S2. Parameter initial guess and bounds.....                                                        | 2         |
| S3. Median and range of fitted model parameters .....                                              | 3         |
| S4. Quality of fit metrics.....                                                                    | 4         |
| S5. P-value matrix of final tumor cell number comparisons for Experiment 1 .....                   | 5         |
| <b>Experiment 1: Empirical parameter formulas</b> .....                                            | <b>6</b>  |
| S6. Fitted empirical parameter values and confidence intervals.....                                | 6         |
| S7. Quality of fit metrics.....                                                                    | 6         |
| <b>Experiment 2: Varying treatment interval</b> .....                                              | <b>7</b>  |
| S8. Parameter initial guess and bounds.....                                                        | 7         |
| S9. Median and range of fitted model parameters .....                                              | 8         |
| S10. Quality of fit metrics.....                                                                   | 9         |
| S11. P-value matrix of final tumor cell number comparisons for Experiment 2 .....                  | 10        |
| <b>Experiment 3: Varying number of doses</b> .....                                                 | <b>11</b> |
| <i>2-day inter-treatment interval</i> .....                                                        | 11        |
| S12. Parameter initial guess and bounds.....                                                       | 11        |
| S13. Median and range of fitted model parameters .....                                             | 12        |
| S14. Quality of fit metrics.....                                                                   | 13        |
| S15. P-value matrix of final tumor cell number comparisons for Experiment 3 (2-day interval) ..... | 13        |
| <i>2-week inter-treatment interval</i> .....                                                       | 14        |
| S16. Parameter initial guess and bounds: constant parameters.....                                  | 14        |
| S17. Parameter initial guess and bounds: $f_r$ and $\gamma_d$ .....                                | 14        |
| S18. Median and range of fitted model parameters: constant parameters .....                        | 15        |

|                                                                                                                      |           |
|----------------------------------------------------------------------------------------------------------------------|-----------|
| S19. Median and range of fitted model parameters: $f_r$ and $\gamma_d$ .....                                         | 15        |
| S20. Quality of fit metrics.....                                                                                     | 16        |
| S21. P-value matrix of final tumor cell number comparisons for Experiment 3 (2-week interval)....                    | 16        |
| <b>Supplementary Figures</b> .....                                                                                   | <b>17</b> |
| S1. Logistic model fits to the untreated datasets from Experiment 1.....                                             | 17        |
| S2. Single-dose model fits to all the varying concentration datasets .....                                           | 18        |
| S3. Multiple-dose model fits to all the varying inter-treatment interval datasets .....                              | 21        |
| S4. Multiple-dose model fits to all the datasets with varying number of doses: 2-day inter-treatment intervals.....  | 26        |
| S5. Multiple-dose model fits to all the datasets with varying number of doses: 2-week inter-treatment intervals..... | 29        |

## Supplementary Tables

---

| <b>Parameter</b> | <b>Definition</b>                                                  | <b>Units</b>    |
|------------------|--------------------------------------------------------------------|-----------------|
| $N_0$            | Initial number of tumor cells                                      | cells           |
| $g_0$            | Baseline proliferation rate                                        | $\text{h}^{-1}$ |
| $\theta_u$       | Untreated carrying capacity                                        | cells           |
| $\theta_{Dox}$   | Treated carrying capacity                                          | cells           |
| $f_r$            | Fraction of resistant cells                                        | -               |
| $g_r$            | Proliferation rate of drug-resistant tumor cells                   | $\text{h}^{-1}$ |
| $g_s$            | Proliferation rate of drug-sensitive tumor cells                   | $\text{h}^{-1}$ |
| $k_d$            | Doxorubicin-induced death rate of drug-sensitive tumor cells       | $\text{h}^{-1}$ |
| $\gamma_d$       | Doxorubicin-induced death delay rate of drug-sensitive tumor cells | $\text{h}^{-1}$ |

**Supplementary Table S1.** Definition and units of the model parameters.

| Dose<br>[nM] | Initial guess and bounds    |                           |                          |                |                           |                           |                           |                                  |
|--------------|-----------------------------|---------------------------|--------------------------|----------------|---------------------------|---------------------------|---------------------------|----------------------------------|
|              | $N_0$ [cells]               | $g_0$ [ $\text{h}^{-1}$ ] | $\theta_{Dox}$ [cells]   | $f_r$ [-]      | $g_r$ [ $\text{h}^{-1}$ ] | $g_s$ [ $\text{h}^{-1}$ ] | $k_d$ [ $\text{h}^{-1}$ ] | $\gamma_d s$ [ $\text{h}^{-1}$ ] |
| <b>0</b>     | $N_{0,obs}$<br>[700, 2000]  | 0.025<br>[0.0075, 0.035]  | 60000<br>[40000, 70000]* | -              | -                         | -                         | -                         | -                                |
| <b>10</b>    | $N_{0,obs}$<br>[1200, 3000] | 0.03<br>[0.02, 0.035]     | 60000<br>[15000, 90000]  | 0.75<br>[0, 1] | 0.02<br>[0.001, 0.05]     | 0.05<br>[0.001, 0.065]    | -0.001<br>[-0.01, 0]      | 0.01<br>[1/120, 1/10]            |
| <b>20</b>    | „                           | „                         | „                        | „              | „                         | „                         | „                         | „                                |
| <b>35</b>    | „                           | „                         | 50000<br>[15000, 90000]  | 0.5<br>[0, 1]  | „                         | „                         | „                         | 0.015<br>[1/120, 1/10]           |
| <b>50</b>    | „                           | „                         | 60000<br>[15000, 90000]  | „              | „                         | „                         | „                         | „                                |
| <b>75</b>    | „                           | „                         | „                        | „              | „                         | „                         | „                         | 0.02<br>[1/120, 1/10]            |
| <b>100</b>   | „                           | „                         | „                        | „              | „                         | „                         | „                         | 0.035<br>[1/120, 1/10]           |
| <b>125</b>   | „                           | „                         | „                        | „              | „                         | 0.01<br>[0.001, 0.065]    | „                         | 0.04<br>[1/120, 1/10]            |
| <b>150</b>   | „                           | „                         | 80000<br>[15000, 90000]  | 0.25<br>[0, 1] | „                         | „                         | „                         | 0.05<br>[1/120, 1/10]            |
| <b>300</b>   | „                           | „                         | 60000<br>[15000, 90000]  | „              | „                         | 0.005<br>[0.001, 0.065]   | -0.0025<br>[-0.01, 0]     | „                                |

**Supplementary Table S2.** Parameter initial guesses and bounds used for fitting the single-dose model to time courses resulting from cells treated with a single dose of doxorubicin at varying concentrations (n = 6 per tested concentration; Experiment 1 in Table 1 of the main text). A ditto mark ( „ ) indicates that the initial guess and bounds are identical to the values in the cells above. \*For 0 nM, we report the initial guess and bounds for  $\theta_u$  instead of  $\theta_{Dox}$ .

| Dose<br>[nM] | Parameter values     |                          |                          |                                         |                            |                          |                                                                            |                               |
|--------------|----------------------|--------------------------|--------------------------|-----------------------------------------|----------------------------|--------------------------|----------------------------------------------------------------------------|-------------------------------|
|              | $N_0$ [cells]        | $g_0$ [h <sup>-1</sup> ] | $\theta_{Dox}$ [cells]   | $f_r$ [-]                               | $g_r$ [h <sup>-1</sup> ]   | $g_s$ [h <sup>-1</sup> ] | $k_d$ [h <sup>-1</sup> ]                                                   | $\gamma_d$ [h <sup>-1</sup> ] |
| <b>0</b>     | 1276<br>[1120, 1409] | 0.028<br>[0.027, 0.028]  | 54640<br>[51414, 55769]* | -                                       | -                          | -                        | -                                                                          | -                             |
| <b>10</b>    | 1400<br>[1346, 1482] | 0.026<br>[0.026, 0.027]  | 63579<br>[61403, 66880]  | 0.82<br>[0.80, 0.85]                    | 0.019<br>[0.019, 0.021]    | 0.045<br>[0.04, 0.05]    | $-7.6 \times 10^{-4}$<br>[ $-9.3 \times 10^{-4}$ , $-2.4 \times 10^{-4}$ ] | 0.01<br>[0.0084, 0.012]       |
| <b>20</b>    | 1444<br>[1283, 1475] | 0.026<br>[0.025, 0.027]  | 77484<br>[71701, 83936]  | 0.54<br>[0.50, 0.58]                    | 0.015<br>[0.014, 0.015]    | 0.037<br>[0.031, 0.039]  | -0.0054<br>[-0.0091, -0.0038]                                              | 0.018<br>[0.015, 0.022]       |
| <b>35</b>    | 1346<br>[1248, 1386] | 0.024<br>[0.023, 0.024]  | 63576<br>[48622, 73338]  | 0.071<br>[0.049, 0.18]                  | 0.018<br>[0.013, 0.021]    | 0.031<br>[0.029, 0.035]  | -0.0072<br>[-0.008, -0.0059]                                               | 0.02<br>[0.019, 0.027]        |
| <b>50</b>    | 1370<br>[1305, 1499] | 0.024<br>[0.023, 0.025]  | 68827<br>[61904, 71593]  | 0.051<br>[0.036, 0.091]                 | 0.014<br>[0.011, 0.021]    | 0.027<br>[0.025, 0.035]  | -0.008<br>[-0.009, -0.0067]                                                | 0.025<br>[0.021, 0.031]       |
| <b>75</b>    | 1469<br>[1326, 1563] | 0.024<br>[0.022, 0.025]  | 68569<br>[52398, 77716]  | 0.031<br>[0.012, 0.036]                 | 0.011<br>[0.0081, 0.016]   | 0.021<br>[0.015, 0.031]  | -0.007<br>[-0.0077, -0.0061]                                               | 0.028<br>[0.023, 0.033]       |
| <b>100</b>   | 1480<br>[1323, 1564] | 0.023<br>[0.022, 0.025]  | 68167<br>[66466, 79285]  | 0.02<br>[0.015, 0.057]                  | 0.0079<br>[0.0024, 0.0091] | 0.026<br>[0.011, 0.032]  | -0.0055<br>[-0.0078, -0.0042]                                              | 0.038<br>[0.025, 0.046]       |
| <b>125</b>   | 1435<br>[1352, 1505] | 0.026<br>[0.024, 0.028]  | 68167<br>[20746, 68167]  | 0.0095<br>[ $9 \times 10^{-5}$ , 0.057] | 0.0031<br>[0.001, 0.011]   | 0.013<br>[0.0058, 0.018] | -0.0049<br>[-0.0086, -0.0041]                                              | 0.024<br>[0.021, 0.046]       |
| <b>150</b>   | 1444<br>[1234, 1562] | 0.024<br>[0.022, 0.025]  | 68167<br>[68167, 88076]  | 0.0092<br>[ $4 \times 10^{-5}$ , 0.02]  | 0.0035<br>[0.002, 0.015]   | 0.012<br>[0.009, 0.024]  | -0.0047<br>[-0.0068, -0.0043]                                              | 0.031<br>[0.024, 0.033]       |
| <b>300</b>   | 1482<br>[1381, 1546] | 0.025<br>[0.024, 0.025]  | 68167<br>[68167, 68167]  | 0.0072<br>[ $5 \times 10^{-4}$ , 0.014] | 0.0028<br>[0.0018, 0.0063] | 0.014<br>[0.0096, 0.022] | -0.0046<br>[-0.0051, -0.0043]                                              | 0.043<br>[0.033, 0.06]        |

**Supplementary Table S3.** Median and range of the single-dose model parameters obtained from the fits to the time courses resulting from cells treated with a single dose of doxorubicin at varying concentrations (n = 6 per tested concentration; Experiment 1 in Table 1 of the main text). \*For 0 nM, we report the mean and range for  $\theta_u$  instead of  $\theta_{Dox}$ .

| Dose [nM]  | Quality of fit metrics |                         |                         |                      |
|------------|------------------------|-------------------------|-------------------------|----------------------|
|            | NRMSE [%]              | $R^2$                   | PCC                     | CCC                  |
| <b>0</b>   | 1.11 [0.76, 1.40]      | >0.999 [>0.999, >0.999] | >0.999 [>0.999, >0.999] | 0.986 [0.985, 0.986] |
| <b>10</b>  | 1.13 [0.804, 1.2]      | >0.999 [>0.999, >0.999] | >0.99 [>0.999, >0.999]  | 0.984 [0.984, 0.985] |
| <b>20</b>  | 1.46 [1.23, 2.29]      | 0.999 [0.999, >0.999]   | >0.99 [0.999, >0.999]   | 0.986 [0.986, 0.986] |
| <b>35</b>  | 2.58 [0.804, 2.87]     | 0.999 [0.999, 0.999]    | 0.999 [0.999, >0.999]   | 0.991 [0.990, 0.991] |
| <b>50</b>  | 3.07 [0.804, 4.37]     | 0.998 [0.998, >0.999]   | 0.999 [0.999, >0.999]   | 0.991 [0.991, 0.992] |
| <b>75</b>  | 2.75 [0.804, 4.61]     | 0.999 [0.995, >0.999]   | 0.999 [0.997, >0.999]   | 0.994 [0.992, 0.994] |
| <b>100</b> | 5.19 [0.804, 10.2]     | 0.993 [0.959, 0.997]    | 0.996 [0.980, 0.998]    | 0.991 [0.973, 0.993] |
| <b>125</b> | 4.53 [0.804, 8.48]     | 0.996 [0.972, 0.997]    | 0.998 [0.986, 0.999]    | 0.993 [0.981, 0.994] |
| <b>150</b> | 8.48 [0.804, 12.2]     | 0.990 [0.985, 0.999]    | 0.995 [0.993, >0.999]   | 0.991 [0.989, 0.996] |
| <b>300</b> | 9.06 [0.804, 12]       | 0.990 [0.981, 0.996]    | 0.995 [0.991, 0.998]    | 0.992 [0.987, 0.994] |

**Supplementary Table S4.** Median and range of the quality of fit metrics for the single-dose model fits to the time courses resulting from cells treated with a single dose of doxorubicin at varying concentrations (n = 6 per tested concentration; Experiment 1 in Table 1 of the main text).



| Dose [nM] | 0 | 10     | 20            | 35            | 50            | 75            | 100           | 125           | 150           | 300           |
|-----------|---|--------|---------------|---------------|---------------|---------------|---------------|---------------|---------------|---------------|
| 0         | - | 0.9372 | <b>0.0022</b> | <b>0.0087</b> | <b>0.0022</b> | <b>0.0022</b> | <b>0.0022</b> | <b>0.0022</b> | <b>0.0043</b> | <b>0.0022</b> |
| 10        | - | -      | <b>0.0022</b> | <b>0.0022</b> | <b>0.0022</b> | <b>0.0022</b> | <b>0.0022</b> | <b>0.0022</b> | <b>0.0022</b> | <b>0.0022</b> |
| 20        | - | -      | -             | 0.1797        | 0.0931        | <b>0.0022</b> | <b>0.0022</b> | <b>0.0022</b> | 0.0649        | <b>0.0022</b> |
| 35        | - | -      | -             | -             | 0.0931        | <b>0.0043</b> | <b>0.0022</b> | <b>0.0022</b> | 0.0649        | <b>0.0022</b> |
| 50        | - | -      | -             | -             | -             | 0.0649        | <b>0.0043</b> | <b>0.0022</b> | 0.0931        | <b>0.0022</b> |
| 75        | - | -      | -             | -             | -             | -             | 0.1797        | <b>0.0152</b> | 0.1797        | <b>0.0022</b> |
| 100       | - | -      | -             | -             | -             | -             | -             | 0.0931        | 0.3939        | <b>0.0022</b> |
| 125       | - | -      | -             | -             | -             | -             | -             | -             | 0.3939        | 0.9372        |
| 150       | - | -      | -             | -             | -             | -             | -             | -             | -             | 0.2403        |
| 300       | - | -      | -             | -             | -             | -             | -             | -             | -             | -             |

**Supplementary Table S5.** P-values from two-sided Wilcoxon rank sum tests comparing the observed final tumor cell numbers for every distinct combination of the varying doxorubicin concentration datasets (n = 6 per tested concentration; Experiment 1 in Table 1 of the main text). Values bolded in red indicate  $p < 0.05$ .

| Parameter formula                                                 | Parameter values           |                           |                             |                            |
|-------------------------------------------------------------------|----------------------------|---------------------------|-----------------------------|----------------------------|
|                                                                   | $\alpha_1$                 | $\alpha_2$                | $\alpha_3$                  | $\alpha_4$                 |
| $f_r(D) = \alpha_1 e^{-(\alpha_2 D)} + \alpha_3$                  | 1.63<br>[1.05, 2.20]       | 0.065<br>[0.038, 0.093]   | 0.0032<br>[-0.061, 0.068]   | -                          |
| $g_r(D) = \alpha_1 e^{-(\alpha_2 D)}$                             | 0.022<br>[0.017, 0.026]    | 0.010<br>[0.0061, 0.015]  | -                           | -                          |
| $g_s(D) = \alpha_1 e^{-(\alpha_2 D)}$                             | 0.043<br>[0.033, 0.053]    | 0.0074<br>[0.0036, 0.011] | -                           | -                          |
| $k_d(D) = \alpha_1(1 - e^{-(\alpha_2(D-\alpha_3))})^2 - \alpha_4$ | 0.0033<br>[0.0023, 0.0044] | 0.028<br>[0.02, 0.035]    | 41.92<br>[35.24, 48.60]     | 0.0078<br>[0.0072, 0.0084] |
| $\gamma_d(D) = \alpha_1 - \alpha_2 e^{-(\alpha_3 D)}$             | 0.035<br>[0.027, 0.043]    | 0.026<br>[0.006, 0.047]   | 0.0104<br>[-0.0062, 0.0270] | -                          |

**Supplementary Table S6.** Fitted empirical parameter values and the corresponding 95% confidence intervals for the empirical parameter formulas derived from the single-dose model fits to the varying doxorubicin concentration datasets (n = 6 per tested concentration; Experiment 1 in Table 1 of the main text).

| Parameter formula                                                 | Quality of fit metrics |       |       |       |
|-------------------------------------------------------------------|------------------------|-------|-------|-------|
|                                                                   | NRMSE [%]              | $R^2$ | PCC   | CCC   |
| $f_r(D) = \alpha_1 e^{-(\alpha_2 D)} + \alpha_3$                  | 153.64*                | 0.977 | 0.985 | 0.876 |
| $g_r(D) = \alpha_1 e^{-(\alpha_2 D)}$                             | 16.73                  | 0.909 | 0.953 | 0.845 |
| $g_s(D) = \alpha_1 e^{-(\alpha_2 D)}$                             | 17.65                  | 0.818 | 0.912 | 0.810 |
| $k_d(D) = \alpha_1(1 - e^{-(\alpha_2(D-\alpha_3))})^2 - \alpha_4$ | 5.45                   | 0.978 | 0.992 | 0.879 |
| $\gamma_d(D) = \alpha_1 - \alpha_2 e^{-(\alpha_3 D)}$             | 17.94                  | 0.784 | 0.883 | 0.779 |

**Supplementary Table S7.** Quality of fit metrics for the empirical parameter formulas derived from the single-dose model fits to the varying doxorubicin concentration datasets (n = 6 per tested concentration; Experiment 1 in Table 1 of the main text). \*For larger drug concentrations,  $f_r$  takes on values on the order of  $10^{-5}$ , such that natural variations of  $f_r$  across replicates may result in NRMSE values greater than 100%. However, these variations have a negligible impact on model outcome.

| Interval<br>[d]                                                                    | Initial guess and bounds    |                          |                         |                    |                 |                          |                          |                                   |                                 |                                 |                   |
|------------------------------------------------------------------------------------|-----------------------------|--------------------------|-------------------------|--------------------|-----------------|--------------------------|--------------------------|-----------------------------------|---------------------------------|---------------------------------|-------------------|
|                                                                                    | $N_0$ [cells]               | $g_0$ [h <sup>-1</sup> ] | $\theta_{Dox}$ [cells]  | $f_r^1$ [-]        | $f_r^2$ [-]     | $g_r$ [h <sup>-1</sup> ] | $g_s$ [h <sup>-1</sup> ] | $k_d$ [h <sup>-1</sup> ]          | $\gamma_d^1$ [h <sup>-1</sup> ] | $\gamma_d^2$ [h <sup>-1</sup> ] |                   |
| <b>Multiple-dose model with constant parameters</b>                                |                             |                          |                         |                    |                 |                          |                          |                                   |                                 |                                 |                   |
| <b>0</b>                                                                           | $N_{0,obs}$<br>[1000, 2500] | 0.0234<br>[0.02, 0.035]  | 60000<br>[30000, 90000] | 0.0337<br>[0, 1]   |                 | 0.0101<br>[0.001, 0.05]  | 0.0277<br>[0.001, 0.05]  | -0.0069<br>[-0.01, 0]             |                                 | 0.0325<br>[0, 1/15]             |                   |
| <b>2</b>                                                                           | //                          | //                       | //                      | //                 |                 | //                       | //                       | //                                |                                 | //                              |                   |
| <b>4</b>                                                                           | //                          | //                       | //                      | //                 |                 | //                       | //                       | //                                |                                 | //                              |                   |
| <b>6</b>                                                                           | //                          | //                       | //                      | //                 |                 | //                       | //                       | //                                |                                 | //                              |                   |
| <b>Multiple-dose model with varying <math>f_r</math> and <math>\gamma_d</math></b> |                             |                          |                         |                    |                 |                          |                          |                                   |                                 |                                 |                   |
| <b>8</b>                                                                           | $N_{0,obs}$<br>[1200, 2500] | 0.0234<br>[0.02, 0.035]  | 60000<br>[15000, 90000] | 0.0337<br>[0, 0.1] | 0.005<br>[0, 1] | 0.0101<br>[0.001, 0.05]  | 0.0277<br>[0.001, 0.055] | -5×10 <sup>-4</sup><br>[-0.01, 0] |                                 | 0.0325<br>[0, 1/15]             | 1/75<br>[0, 1/15] |
| <b>10</b>                                                                          | //                          | //                       | //                      | //                 | //              | //                       | //                       | //                                |                                 | //                              | //                |
| <b>12</b>                                                                          | //                          | //                       | //                      | //                 | //              | //                       | //                       | //                                |                                 | //                              | //                |
| <b>14</b>                                                                          | //                          | //                       | //                      | //                 | //              | //                       | //                       | //                                |                                 | //                              | //                |
| <b>16</b>                                                                          | //                          | //                       | //                      | //                 | //              | //                       | //                       | //                                |                                 | //                              | //                |

**Supplementary Table S8.** Parameter initial guesses and bounds used for fitting the multiple-dose model to the time courses resulting from cells treated with two consecutive doses of 75 nM doxorubicin delivered at varying inter-treatment intervals (n = 12 per tested interval; Experiment 2 in Table 1 of the main text). A ditto mark ( // ) indicates that the initial guess and bounds are identical to the values in the cells above.

| Interval<br>[d]                                                                    | Parameter values     |                          |                         |                                        |                         |                            |                            |                               |                                 |                                 |
|------------------------------------------------------------------------------------|----------------------|--------------------------|-------------------------|----------------------------------------|-------------------------|----------------------------|----------------------------|-------------------------------|---------------------------------|---------------------------------|
|                                                                                    | $N_0$ [cells]        | $g_0$ [h <sup>-1</sup> ] | $\theta_{Dox}$ [cells]  | $f_r^1$ [-]                            | $f_r^2$ [-]             | $g_r$ [h <sup>-1</sup> ]   | $g_s$ [h <sup>-1</sup> ]   | $k_d$ [h <sup>-1</sup> ]      | $\gamma_d^1$ [h <sup>-1</sup> ] | $\gamma_d^2$ [h <sup>-1</sup> ] |
| <b>Multiple-dose model with constant parameters</b>                                |                      |                          |                         |                                        |                         |                            |                            |                               |                                 |                                 |
| <b>0</b>                                                                           | 1468<br>[1354, 1542] | 0.024<br>[0.023, 0.025]  | 53376<br>[42605, 80016] | 0.0019<br>[7×10 <sup>-5</sup> , 0.017] |                         | 0.002<br>[0.001, 0.014]    | 0.022<br>[0.012, 0.026]    | -0.0035<br>[-0.0047, -0.002]  |                                 | 0.046<br>[0.027, 0.057]         |
| <b>2</b>                                                                           | 1468<br>[1381, 1591] | 0.024<br>[0.024, 0.025]  | 53376<br>[53376, 53376] | 0.012<br>[0.0069, 0.23]                |                         | 0.0045<br>[0.0028, 0.0069] | 0.026<br>[0.023, 0.038]    | -0.0035<br>[-0.0047, -0.0032] |                                 | 0.048<br>[0.042, 0.063]         |
| <b>4</b>                                                                           | 1514<br>[1396, 1572] | 0.024<br>[0.023, 0.025]  | 53376<br>[53376, 53376] | 0.018<br>[0.016, 0.084]                |                         | 0.0067<br>[0.0054, 0.0079] | 0.022<br>[0.021, 0.025]    | -0.0037<br>[-0.0042, -0.0034] |                                 | 0.04<br>[0.035, 0.05]           |
| <b>6</b>                                                                           | 1411<br>[1312, 1591] | 0.024<br>[0.023, 0.025]  | 53376<br>[30690, 53376] | 0.031<br>[0.011, 0.09]                 |                         | 0.0086<br>[0.0063, 0.011]  | 0.019<br>[0.017, 0.022]    | -0.0042<br>[-0.0061, -0.0033] |                                 | 0.031<br>[0.027, 0.04]          |
| <b>Multiple-dose model with varying <math>f_r</math> and <math>\gamma_d</math></b> |                      |                          |                         |                                        |                         |                            |                            |                               |                                 |                                 |
| <b>8</b>                                                                           | 1572<br>[1289, 1676] | 0.021<br>[0.02, 0.024]   | 53376<br>[36130, 56316] | 0.0170<br>[0.0009, 0.0310]             | 0.1100<br>[0.029, 0.20] | 0.0093<br>[0.0010, 0.0160] | 0.0020<br>[0.0160, 0.0230] | -0.0036<br>[-0.0043, -0.0027] | 0.0340<br>[0.0280, 0.0440]      | 0.0300<br>[0.0120, 0.0440]      |
| <b>10</b>                                                                          | 1573<br>[1382, 1687] | 0.022<br>[0.02, 0.025]   | 53376<br>[36130, 56316] | 0.021<br>[0.0055, 0.037]               | 0.13<br>[0.051, 0.23]   | 0.0094<br>[0.0077, 0.015]  | 0.019<br>[0.015, 0.022]    | -0.0034<br>[-0.0046, -0.0027] | 0.032<br>[0.024, 0.039]         | 0.024<br>[0.014, 0.034]         |
| <b>12</b>                                                                          | 1372<br>[1209, 1479] | 0.022<br>[0.020, 0.025]  | 53376<br>[46045, 67004] | 0.016<br>[0.0083, 0.033]               | 0.16<br>[0.079, 0.24]   | 0.0098<br>[0.0084, 0.012]  | 0.02<br>[0.017, 0.024]     | -0.0031<br>[-0.0036, -0.0021] | 0.041<br>[0.035, 0.051]         | 0.016<br>[0.0089, 0.032]        |
| <b>14</b>                                                                          | 1428<br>[1327, 1850] | 0.022<br>[0.020, 0.025]  | 58091<br>[37433, 73197] | 0.025<br>[0.0066, 0.042]               | 0.082<br>[0.046, 0.26]  | 0.01<br>[0.0078, 0.012]    | 0.019<br>[0.0038, 0.024]   | -0.0031<br>[-0.0048, -0.0017] | 0.042<br>[0.025, 0.065]         | 0.014<br>[0.011, 0.026]         |
| <b>16</b>                                                                          | 1560<br>[1350, 1684] | 0.023<br>[0.021, 0.025]  | 53376<br>[42964, 81236] | 0.032<br>[0.016, 0.04]                 | 0.13<br>[0.075, 0.25]   | 0.01<br>[0.007, 0.012]     | 0.019<br>[0.013, 0.021]    | -0.0039<br>[-0.0049, -0.0031] | 0.04<br>[0.028, 0.047]          | 0.018<br>[0.012, 0.038]         |

**Supplementary Table S9.** Median and range of the multiple-dose model parameters obtained from the fits to the time courses resulting from cells treated with two consecutive doses of 75 nM doxorubicin delivered at varying inter-treatment intervals (n = 12 per tested interval; Experiment 2 in Table 1 of the main text).

| Interval<br>[d]                                                                    | Quality of fit metrics |                      |                       |                      |
|------------------------------------------------------------------------------------|------------------------|----------------------|-----------------------|----------------------|
|                                                                                    | NRMSE [%]              | $R^2$                | PCC                   | CCC                  |
| <b>Multiple-dose model with constant parameters</b>                                |                        |                      |                       |                      |
| <b>0</b>                                                                           | 4.9 [3.2, 13.5]        | 0.995 [0.948, 0.998] | 0.998 [0.974, 0.999]  | 0.994 [0.969, 0.995] |
| <b>2</b>                                                                           | 4.39 [3.26, 4.76]      | 0.996 [0.992, 0.998] | 0.998 [0.996, 0.999]  | 0.994 [0.992, 0.995] |
| <b>4</b>                                                                           | 6.12 [5.03, 7.27]      | 0.991 [0.979, 0.994] | 0.995 [0.990, 0.997]  | 0.991 [0.986, 0.993] |
| <b>6</b>                                                                           | 5.27 [2.74, 9.47]      | 0.992 [0.971, 0.999] | 0.996 [0.986, >0.999] | 0.992 [0.982, 0.996] |
| <b>Multiple-dose model with varying <math>f_r</math> and <math>\gamma_d</math></b> |                        |                      |                       |                      |
| <b>8</b>                                                                           | 4.57 [3.59, 6.32]      | 0.993 [0.983, 0.997] | 0.997 [0.992, 0.999]  | 0.992 [0.988, 0.995] |
| <b>10</b>                                                                          | 4.08 [3.59, 6.57]      | 0.992 [0.974, 0.998] | 0.996 [0.988, 0.999]  | 0.992 [0.983, 0.995] |
| <b>12</b>                                                                          | 4.54 [3.44, 10.2]      | 0.995 [0.963, 0.998] | 0.998 [0.982, 0.999]  | 0.994 [0.977, 0.995] |
| <b>14</b>                                                                          | 4.39 [2.79, 14.3]      | 0.996 [0.769, 0.999] | 0.998 [0.911, >0.999] | 0.994 [0.898, 0.996] |
| <b>16</b>                                                                          | 4.38 [3.12, 7.04]      | 0.996 [0.971, 0.998] | 0.998 [0.986, 0.999]  | 0.994 [0.981, 0.995] |

**Supplementary Table S10.** Median and range of the quality of fit metrics for the multiple-dose model fits to the time courses resulting from cells treated with two consecutive doses of 75 nM doxorubicin delivered at varying inter-treatment intervals (n = 12 per tested interval; Experiment 2 in Table 1 of the main text).

| Interval [d] | 0 | 2      | 4             | 6                           | 8                           | 10                          | 12                          | 14                          | 16                          |
|--------------|---|--------|---------------|-----------------------------|-----------------------------|-----------------------------|-----------------------------|-----------------------------|-----------------------------|
| 0            | - | 0.2145 | 0.4705        | 0.0999                      | 0.0783                      | <b>0.0226</b>               | <b>0.0166</b>               | <b>0.0102</b>               | <b>0.0061</b>               |
| 2            | - | -      | <b>0.0029</b> | <b>1.96×10<sup>-4</sup></b> | <b>1.55×10<sup>-4</sup></b> | <b>3.66×10<sup>-5</sup></b> | <b>3.66×10<sup>-5</sup></b> | <b>3.66×10<sup>-5</sup></b> | <b>3.66×10<sup>-5</sup></b> |
| 4            | - | -      | -             | <b>0.0102</b>               | <b>0.0029</b>               | <b>3.66×10<sup>-5</sup></b> | <b>3.66×10<sup>-5</sup></b> | <b>3.66×10<sup>-5</sup></b> | <b>3.66×10<sup>-5</sup></b> |
| 6            | - | -      | -             | -                           | 0.5067                      | <b>0.0262</b>               | <b>0.0035</b>               | <b>0.0120</b>               | <b>0.0011</b>               |
| 8            | - | -      | -             | -                           | -                           | 0.1749                      | 0.0783                      | <b>0.0404</b>               | <b>0.0024</b>               |
| 10           | - | -      | -             | -                           | -                           | -                           | 0.5834                      | 0.4705                      | 0.0690                      |
| 12           | - | -      | -             | -                           | -                           | -                           | -                           | 0.5444                      | 0.1124                      |
| 14           | - | -      | -             | -                           | -                           | -                           | -                           | -                           | 0.5444                      |
| 16           | - | -      | -             | -                           | -                           | -                           | -                           | -                           | -                           |

**Supplementary Table S11.** P-values from two-sided Wilcoxon rank sum tests comparing the observed final tumor cell numbers for every distinct combination of the varying inter-treatment interval datasets (n = 12 per tested interval; Experiment 2 in Table 1 of the main text). Values bolded in red indicate  $p < 0.05$ .

| Number of doses | Initial guess and bounds: 2-day inter-treatment interval |                           |                         |                                 |                                                      |                                                      |                                   |                                |
|-----------------|----------------------------------------------------------|---------------------------|-------------------------|---------------------------------|------------------------------------------------------|------------------------------------------------------|-----------------------------------|--------------------------------|
|                 | $N_0$ [cells]                                            | $g_0$ [ $\text{h}^{-1}$ ] | $\theta_{Dox}$ [cells]  | $f_r$ [-]                       | $g_r$ [ $\text{h}^{-1}$ ]                            | $g_s$ [ $\text{h}^{-1}$ ]                            | $k_d$ [ $\text{h}^{-1}$ ]         | $\gamma_d$ [ $\text{h}^{-1}$ ] |
| <b>1</b>        | $N_{0,obs}$<br>[1000, 2500]                              | 0.0234<br>[0.0225, 0.05]  | 60000<br>[20000, 90000] | 0.0337<br>[0, 0.05]             | 0.0101<br>[ $1 \times 10^{-4}$ , 0.05]               | 0.0277<br>[ $1 \times 10^{-4}$ , 0.05]               | $-1 \times 10^{-5}$<br>[-0.05, 0] | 0.0325<br>[0, 1]               |
| <b>2</b>        | "                                                        | "                         | "                       | 0.01<br>[0, 0.05]               | 0.0025<br>[ $1 \times 10^{-4}$ , 0.05]               | 0.0025<br>[ $1 \times 10^{-4}$ , 0.05]               | -0.015<br>[-0.05, 0]              | "                              |
| <b>3</b>        | "                                                        | "                         | "                       | 0.001<br>[0, 0.05]              | "                                                    | "                                                    | "                                 | 0.05<br>[0, 1]                 |
| <b>4</b>        | "                                                        | "                         | "                       | $1 \times 10^{-5}$<br>[0, 0.05] | "                                                    | "                                                    | "                                 | 0.08<br>[0, 1]                 |
| <b>5</b>        | "                                                        | "                         | "                       | $1 \times 10^{-9}$<br>[0, 0.05] | $1.5 \times 10^{-4}$<br>[ $1 \times 10^{-4}$ , 0.05] | $1.5 \times 10^{-4}$<br>[ $1 \times 10^{-4}$ , 0.05] | -0.035<br>[-0.05, 0]              | 0.75<br>[0, 1]                 |

**Supplementary Table S12.** Parameter initial guesses and bounds used for fitting the multiple-dose model to the time courses resulting from cells treated with a varying number of 75 nM doxorubicin doses delivered at 2-day inter-treatment intervals ( $n = 12$  per tested number of doses; Experiment 3 in Table 1 of the main text). A ditto mark ( " ) indicates that the initial guess and bounds are identical to the values in the cells above.

| Number of Doses | Parameter values: 2-day inter-treatment interval |                           |                         |                                                       |                                                     |                           |                              |                                |
|-----------------|--------------------------------------------------|---------------------------|-------------------------|-------------------------------------------------------|-----------------------------------------------------|---------------------------|------------------------------|--------------------------------|
|                 | $N_0$ [cells]                                    | $g_0$ [ $\text{h}^{-1}$ ] | $\theta_{Dox}$ [cells]  | $f_r$ [-]                                             | $g_r$ [ $\text{h}^{-1}$ ]                           | $g_s$ [ $\text{h}^{-1}$ ] | $k_d$ [ $\text{h}^{-1}$ ]    | $\gamma_d$ [ $\text{h}^{-1}$ ] |
| 1               | 1477<br>[1276, 1712]                             | 0.024<br>[0.023, 0.028]   | 59448<br>[34132, 87537] | 0.02<br>[0.004, 0.029]                                | 0.01<br>[0.0084, 0.015]                             | 0.021<br>[0.0088, 0.03]   | -0.006<br>[-0.0089, -0.003]  | 0.037<br>[0.014, 0.064]        |
| 2               | 1313<br>[1194, 1503]                             | 0.028<br>[0.027, 0.029]   | 59448<br>[59448, 59448] | 0.0088<br>[ $1 \times 10^{-7}$ , 0.05]                | 0.0062<br>[0.0047, 0.0079]                          | 0.019<br>[0.012, 0.039]   | -0.004<br>[-0.0042, -0.0034] | 0.08<br>[0.059, 0.2]           |
| 3               | 1278<br>[1081, 1456]                             | 0.028<br>[0.026, 0.029]   | 59448<br>[59448, 59448] | 0.0066<br>[ $1 \times 10^{-7}$ , 0.016]               | 0.013<br>[0.0099, 0.016]                            | 0.029<br>[0.017, 0.038]   | -0.005<br>[-0.005, -0.0041]  | 0.13<br>[0.088, 0.15]          |
| 4               | 1196<br>[1032, 1380]                             | 0.028<br>[0.026, 0.029]   | 59448<br>[59448, 59448] | $6 \times 10^{-5}$<br>[ $2 \times 10^{-14}$ , 0.0086] | $1 \times 10^{-4}$<br>[ $1 \times 10^{-4}$ , 0.017] | 0.027<br>[0.023, 0.033]   | -0.005<br>[-0.0058, -0.0045] | 0.11<br>[0.074, 0.15]          |
| 5               | 1140<br>[1051, 1305]                             | 0.028<br>[0.026, 0.029]   | 59448<br>[59448, 59448] | 0.031<br>[0.023, 0.047]                               | 0.015<br>[0.013, 0.017]                             | 0.035<br>[0.028, 0.05]    | -0.006<br>[-0.0068, -0.0061] | 0.11<br>[0.086, 0.18]          |

**Supplementary Table S13.** Median and range of the multiple-dose model parameters obtained from the fits to the time courses resulting from cells treated with a varying number of 75 nM doxorubicin doses delivered at 2-day inter-treatment intervals ( $n = 12$  per tested number of doses; Experiment 3 in Table 1 of the main text).



| Number of doses | Quality of fit metrics: 2-day inter-treatment interval |                      |                       |                      |
|-----------------|--------------------------------------------------------|----------------------|-----------------------|----------------------|
|                 | NRMSE [%]                                              | $R^2$                | PCC                   | CCC                  |
| 1               | 3.5 [2.72, 5.79]                                       | 0.998 [0.992, 0.999] | 0.999 [0.996, >0.999] | 0.993 [0.99, 0.994]  |
| 2               | 4.72 [4.14, 19.1]                                      | 0.997 [0.992, 0.999] | 0.998 [0.934, 0.999]  | 0.994 [0.928, 0.995] |
| 3               | 12.1 [10.1, 13.7]                                      | 0.985 [0.992, 0.999] | 0.993 [0.991, 0.995]  | 0.988 [0.987, 0.991] |
| 4               | 16.2 [15.1, 17.5]                                      | 0.975 [0.992, 0.999] | 0.989 [0.987, 0.991]  | 0.984 [0.981, 0.986] |
| 5               | 14.8 [13, 16.4]                                        | 0.983 [0.992, 0.999] | 0.993 [0.991, 0.995]  | 0.988 [0.986, 0.99]  |

**Supplementary Table S14.** Median and range of the quality of fit metrics for the multiple-dose model fits to the time courses resulting from cells treated with a varying number of 75 nM doxorubicin doses delivered at 2-day inter-treatment intervals (n = 12 per tested number of doses; Experiment 3 in Table 1 of the main text).

| Number of doses | 1 | 2                                       | 3                                       | 4                                       | 5                                       |
|-----------------|---|-----------------------------------------|-----------------------------------------|-----------------------------------------|-----------------------------------------|
| 1               | - | <b><math>3.66 \times 10^{-5}</math></b> | <b><math>3.64 \times 10^{-5}</math></b> | <b><math>3.64 \times 10^{-5}</math></b> | <b><math>3.64 \times 10^{-5}</math></b> |
| 2               | - | -                                       | <b>0.0165</b>                           | <b>0.0110</b>                           | <b><math>4.68 \times 10^{-5}</math></b> |
| 3               | - | -                                       | -                                       | 0.7289                                  | <b><math>1.08 \times 10^{-4}</math></b> |
| 4               | - | -                                       | -                                       | -                                       | <b>0.0079</b>                           |
| 5               | - | -                                       | -                                       | -                                       | -                                       |

**Supplementary Table S15.** P-values from 2-sided Wilcoxon rank sum tests comparing the final tumor cell numbers for every distinct combination of the varying dose number datasets with a 2-day inter-treatment interval. (n = 12 per tested number of doses; Experiment 3 in Table 1 of the main text). Values bolded in red indicate  $p < 0.05$ .

| Number of Doses | Initial guess and bounds: 2-week inter-treatment interval |                           |                         |                           |                           |                            |
|-----------------|-----------------------------------------------------------|---------------------------|-------------------------|---------------------------|---------------------------|----------------------------|
|                 | $N_0$ [cells]                                             | $g_0$ [ $\text{h}^{-1}$ ] | $\theta_{Dox}$ [cells]  | $g_r$ [ $\text{h}^{-1}$ ] | $g_s$ [ $\text{h}^{-1}$ ] | $k_d$ [ $\text{h}^{-1}$ ]  |
| 1               | $N_{0,obs}$<br>[900, 3000]                                | 0.0275<br>[0.02, 0.05]    | 80000<br>[15000, 90000] | 0.02<br>[0.001, 0.05]     | 0.0275<br>[0.0125, 0.075] | -0.0075<br>[-0.01, -0.001] |
| 2               | „                                                         | „                         | „                       | „                         | „                         | „                          |
| 3               | „                                                         | „                         | „                       | „                         | „                         | „                          |
| 4               | „                                                         | „                         | „                       | „                         | „                         | „                          |
| 5               | „                                                         | „                         | „                       | „                         | „                         | „                          |

**Supplementary Table S16.** Initial guesses and bounds of the constant parameters used for fitting the multiple-dose model to the time courses resulting from cells treated with a varying number of 75 nM doxorubicin doses delivered at 2-week inter-treatment intervals ( $n = 12$  per tested number of doses; Experiment 3 in Table 1 of the main text). A ditto mark ( „ ) indicates that the initial guess and bounds are identical to the values in the cells above.

| Initial guess & bounds: 2-week inter-treatment interval |                                  |                                  |                                  |                                  |
|---------------------------------------------------------|----------------------------------|----------------------------------|----------------------------------|----------------------------------|
| $f_r^1$ [-]                                             | $f_r^2$ [-]                      | $f_r^3$ [-]                      | $f_r^4$ [-]                      | $f_r^5$ [-]                      |
| 0.001<br>[0, 1]                                         | 0.005<br>[0, 0.5]                | 0.005<br>[0, 0.5]                | 0.005<br>[0, 0.5]                | 0.005<br>[0, 0.5]                |
| $\gamma_d^1$ [ $\text{h}^{-1}$ ]                        | $\gamma_d^2$ [ $\text{h}^{-1}$ ] | $\gamma_d^3$ [ $\text{h}^{-1}$ ] | $\gamma_d^4$ [ $\text{h}^{-1}$ ] | $\gamma_d^5$ [ $\text{h}^{-1}$ ] |
| 1/50<br>[0, 1/15]                                       | 1/50<br>[0, 1/15]                | 1/50<br>[0, 1/15]                | 1/50<br>[0, 1/15]                | 1/50<br>[0, 1/15]                |

**Supplementary Table S17.** Initial guesses and bounds of  $f_r$  and  $\gamma_d$  for each doxorubicin dose used for fitting the multiple-dose model to the time courses resulting from cells treated with a varying number of 75 nM doxorubicin doses delivered at 2-week inter-treatment intervals ( $n = 12$  per tested number of doses; Experiment 3 in Table 1 of the main text). A ditto mark ( „ ) indicates that the initial guess and bounds are identical to the values in the cells above.

| Number of doses | Parameter values: 2-week inter-treatment interval |                           |                         |                           |                           |                               |
|-----------------|---------------------------------------------------|---------------------------|-------------------------|---------------------------|---------------------------|-------------------------------|
|                 | $N_0$ [cells]                                     | $g_0$ [ $\text{h}^{-1}$ ] | $\theta_{Dox}$ [cells]  | $g_r$ [ $\text{h}^{-1}$ ] | $g_s$ [ $\text{h}^{-1}$ ] | $k_d$ [ $\text{h}^{-1}$ ]     |
| 1               | 1626<br>[1437, 1791]                              | 0.024<br>[0.023, 0.025]   | 52460<br>[41191, 73604] | 0.013<br>[0.011, 0.015]   | 0.02<br>[0.014, 0.023]    | -0.0053<br>[-0.0073, -0.0032] |
| 2               | 1322<br>[1066, 1568]                              | 0.026<br>[0.024, 0.027]   | 55086<br>[32671, 62376] | 0.015<br>[0.013, 0.018]   | 0.014<br>[0.013, 0.016]   | -0.0026<br>[-0.0037, -0.0023] |
| 3               | 1345<br>[1051, 1553]                              | 0.025<br>[0.022, 0.027]   | 68390<br>[62376, 78206] | 0.018<br>[0.016, 0.019]   | 0.014<br>[0.013, 0.023]   | -0.0023<br>[-0.0029, -0.001]  |
| 4               | 1182<br>[1017, 1417]                              | 0.024<br>[0.021, 0.026]   | 71551<br>[54867, 77778] | 0.018<br>[0.016, 0.02]    | 0.013<br>[0.013, 0.018]   | -0.0014<br>[-0.0021, -0.001]  |
| 5               | 1114<br>[901, 1287]                               | 0.024<br>[0.021, 0.025]   | 70227<br>[57909, 78940] | 0.019<br>[0.016, 0.019]   | 0.015<br>[0.013, 0.019]   | -0.0014<br>[-0.003, -0.001]   |

**Supplementary Table S18.** Median and range of the constant model parameters from the multiple-dose model fits to the time courses resulting from cells treated with a varying number of 75 nM doxorubicin doses delivered at 2-week inter-treatment intervals ( $n = 12$  per tested number of doses; Experiment 3 in Table 1 of the main text).

| Parameter values: 2-week inter-treatment interval |                                  |                                  |                                  |                                  |
|---------------------------------------------------|----------------------------------|----------------------------------|----------------------------------|----------------------------------|
| $f_r^1$ [-]                                       | $f_r^2$ [-]                      | $f_r^3$ [-]                      | $f_r^4$ [-]                      | $f_r^5$ [-]                      |
| 0.003<br>[ $2 \times 10^{-4}$ , 0.057]            | 0.0076<br>[0.0032, 0.07]         | 0.0076<br>[0.0032, 0.07]         | 0.0076<br>[0.0032, 0.07]         | 0.0076<br>[0.0032, 0.07]         |
| $\gamma_d^1$ [ $\text{h}^{-1}$ ]                  | $\gamma_d^2$ [ $\text{h}^{-1}$ ] | $\gamma_d^3$ [ $\text{h}^{-1}$ ] | $\gamma_d^4$ [ $\text{h}^{-1}$ ] | $\gamma_d^5$ [ $\text{h}^{-1}$ ] |
| 0.039<br>[0.02, 0.067]                            | 0.0097<br>[0.0049, 0.017]        | 0.0097<br>[0.0049, 0.017]        | 0.0097<br>[0.0049, 0.017]        | 0.0097<br>[0.0049, 0.017]        |

**Supplementary Table S19.** Median and range of  $f_r$  and  $\gamma_d$  for each doxorubicin dose from the multiple-dose model fits to the time courses resulting from cells treated with a varying number of 75 nM doxorubicin doses delivered at 2-week inter-treatment intervals ( $n = 12$  per tested number of doses; Experiment 3 in Table 1 of the main text).

| Number of doses | Quality of fit metrics: 2-week inter-treatment interval |                       |                        |                      |
|-----------------|---------------------------------------------------------|-----------------------|------------------------|----------------------|
|                 | NRMSE [%]                                               | $R^2$                 | PCC                    | CCC                  |
| 1               | 2.38 [2.05, 3.11]                                       | 0.999 [0.998, >0.999] | >0.999 [0.999, >0.999] | 0.993 [0.993, 0.994] |
| 2               | 3.45 [2.13, 8.57]                                       | 0.996 [0.932, 0.999]  | 0.998 [0.969, 0.999]   | 0.993 [0.959, 0.995] |
| 3               | 3.69 [2.90, 6.80]                                       | 0.993 [0.952, 0.997]  | 0.997 [0.978, 0.999]   | 0.992 [0.971, 0.995] |
| 4               | 3.51 [1.91, 7.02]                                       | 0.996 [0.975, 0.999]  | 0.998 [0.988, >0.999]  | 0.995 [0.984, 0.997] |
| 5               | 3.10 [1.99, 6.40]                                       | 0.996 [0.934, 0.999]  | 0.998 [0.969, 0.999]   | 0.995 [0.963, 0.997] |

**Supplementary Table S20.** Median and range of the quality of fit metrics for the multiple-dose model fits to time courses resulting from cells treated with a varying number of 75 nM doxorubicin doses delivered at 2-week inter-treatment intervals (n = 12 per tested number of doses; Experiment 3 in Table 1 of the main text).

| Number of doses | 1 | 2                                       | 3                                       | 4                                       | 5                                       |
|-----------------|---|-----------------------------------------|-----------------------------------------|-----------------------------------------|-----------------------------------------|
| 1               | - | <b><math>9.73 \times 10^{-5}</math></b> | <b><math>4.69 \times 10^{-5}</math></b> | <b><math>2.46 \times 10^{-5}</math></b> | <b><math>7.66 \times 10^{-5}</math></b> |
| 2               | - | -                                       | 0.4357                                  | 0.7508                                  | 0.5444                                  |
| 3               | - | -                                       | -                                       | 0.1572                                  | 0.4025                                  |
| 4               | - | -                                       | -                                       | -                                       | 0.3708                                  |
| 5               | - | -                                       | -                                       | -                                       | -                                       |

**Supplementary Table S21.** P-values from 2-sided Wilcoxon rank sum tests comparing the final tumor cell numbers for every distinct combination of the varying dose number datasets with a 2-week treatment interval. (n = 12 per tested number of doses; Experiment 3 in Table 1 of the main text). Values bolded in red indicate  $p < 0.05$ .

## Supplementary Figures

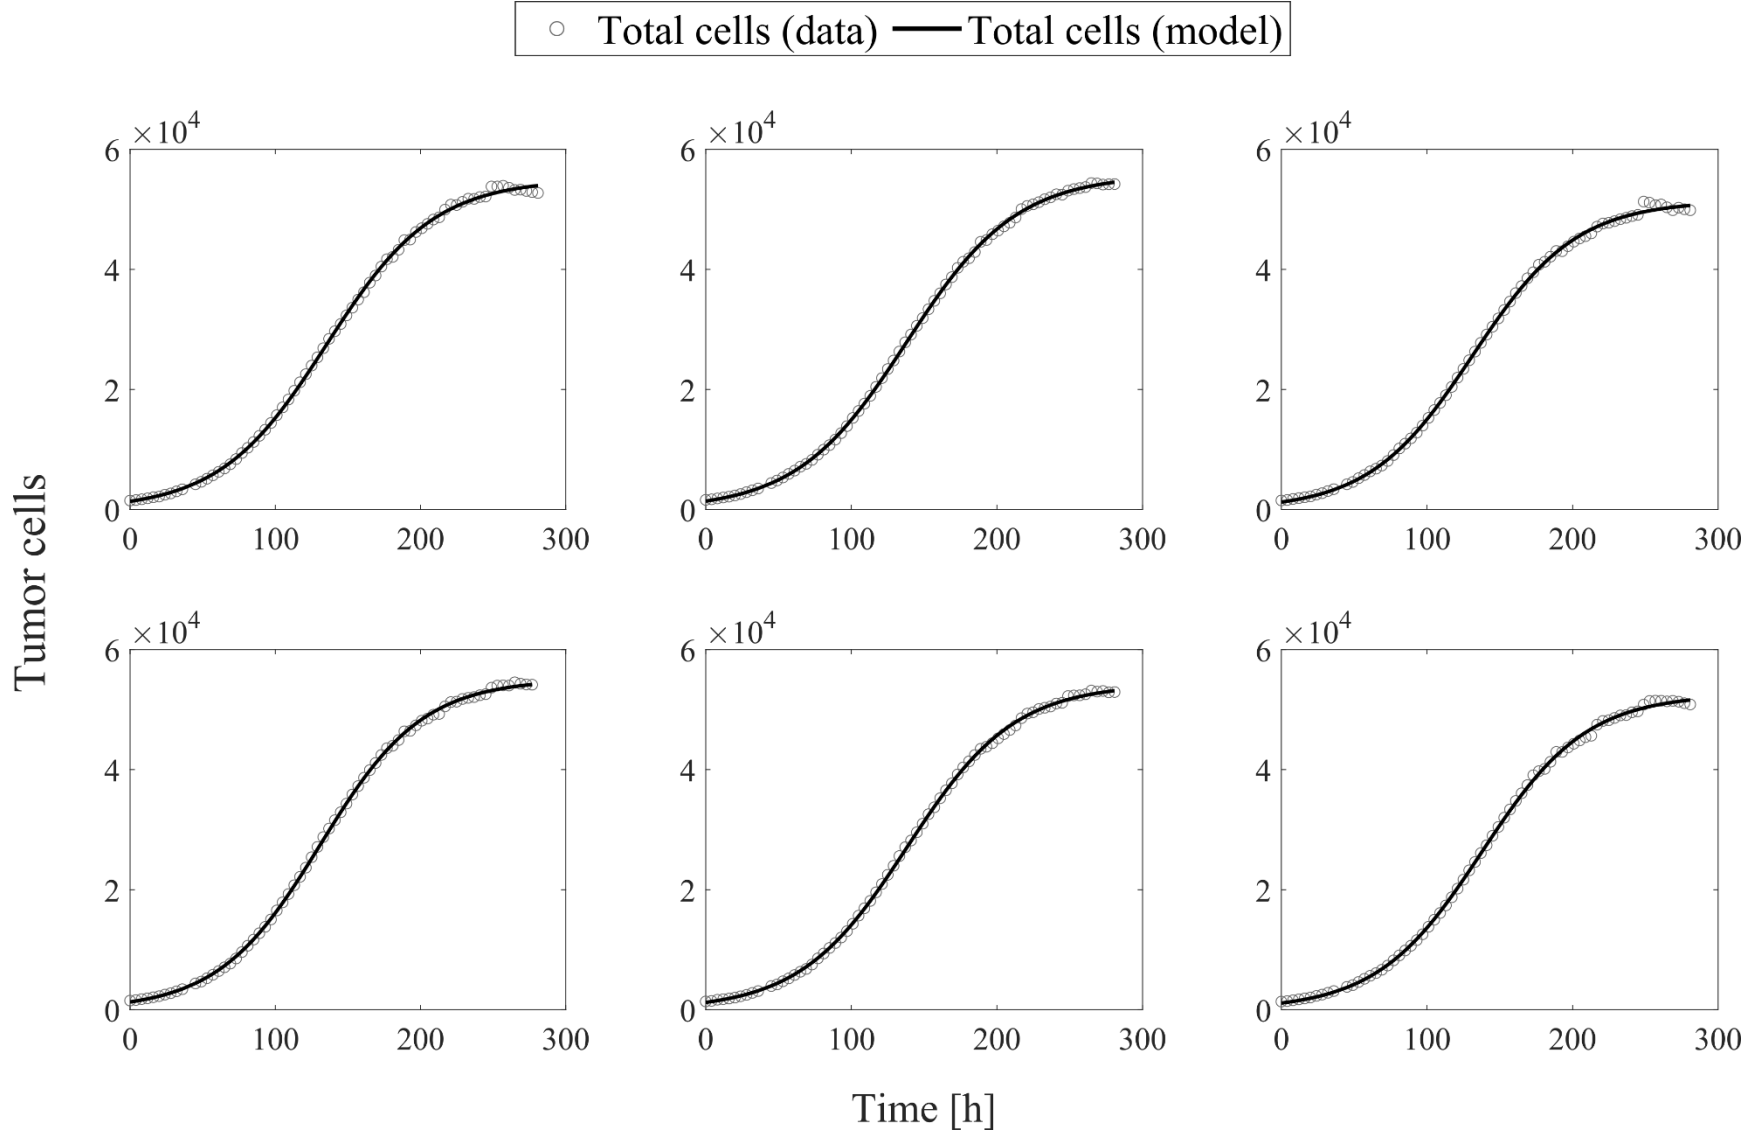

**Supplementary Figure S1.** Logistic growth model fits for all of the untreated tumor cell time courses (i.e., for a doxorubicin concentration of 0 nM in Experiment 1 in Table 1 of the main text;  $n = 6$ ).

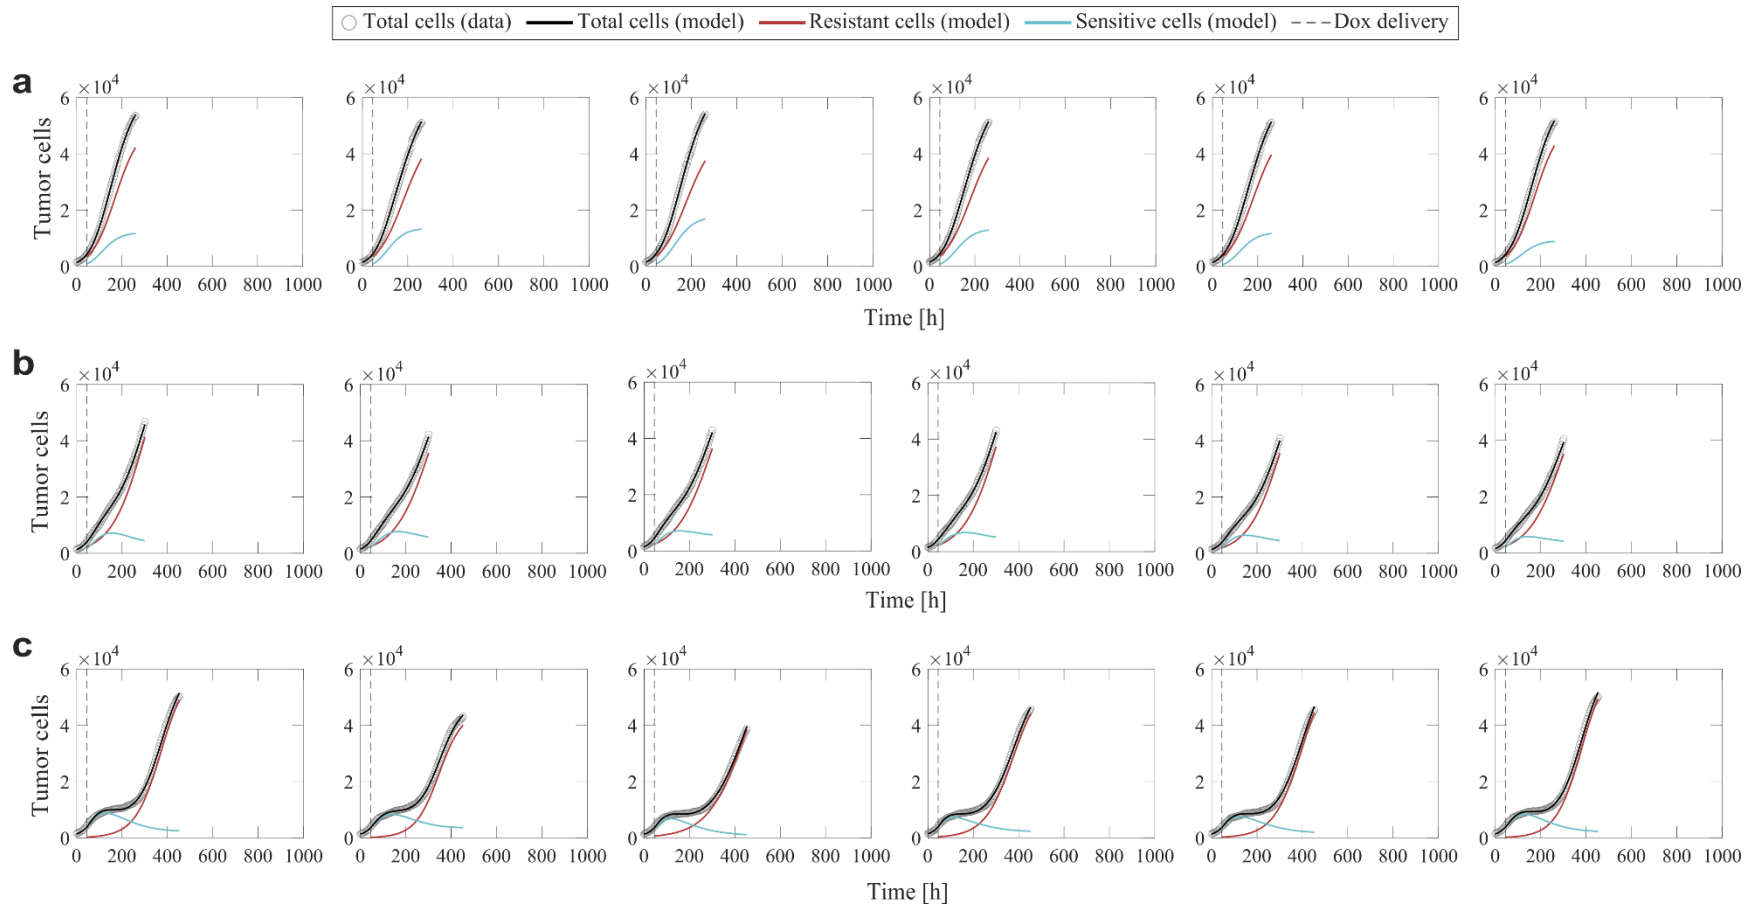

**Supplementary Figure S2.** Single-dose model fits for all of the time courses resulting from cells treated with a single dose of doxorubicin at concentrations ranging from 10 to 300 nM ( $n = 6$  for each concentration; Experiment 1 in Table 1 of the main text). **(a)** 10 nM; **(b)** 20 nM; **(c)** 35 nM.

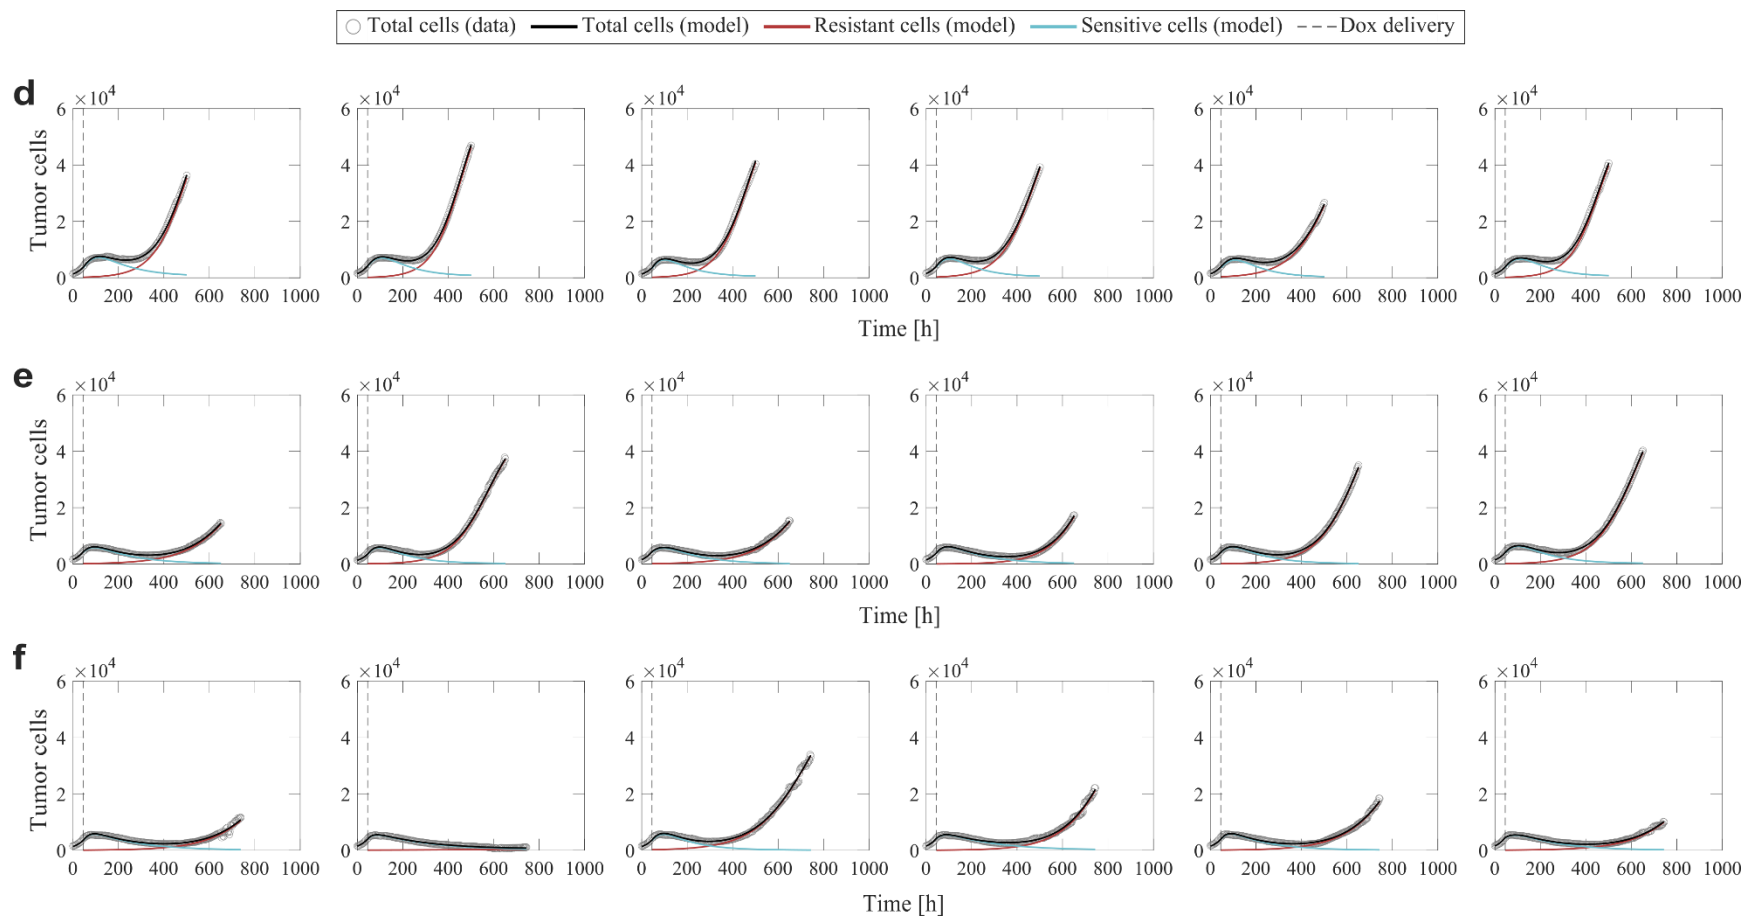

**Supplementary Figure S2 (continued).** Single-dose model fits for all of the time courses resulting from cells treated with a single dose of doxorubicin at concentrations ranging from 10 to 300 nM ( $n = 6$  for each concentration; Experiment 1 in Table 1 of the main text). **(d)** 50nM; **(e)** 75nM; **(f)** 100 nM.

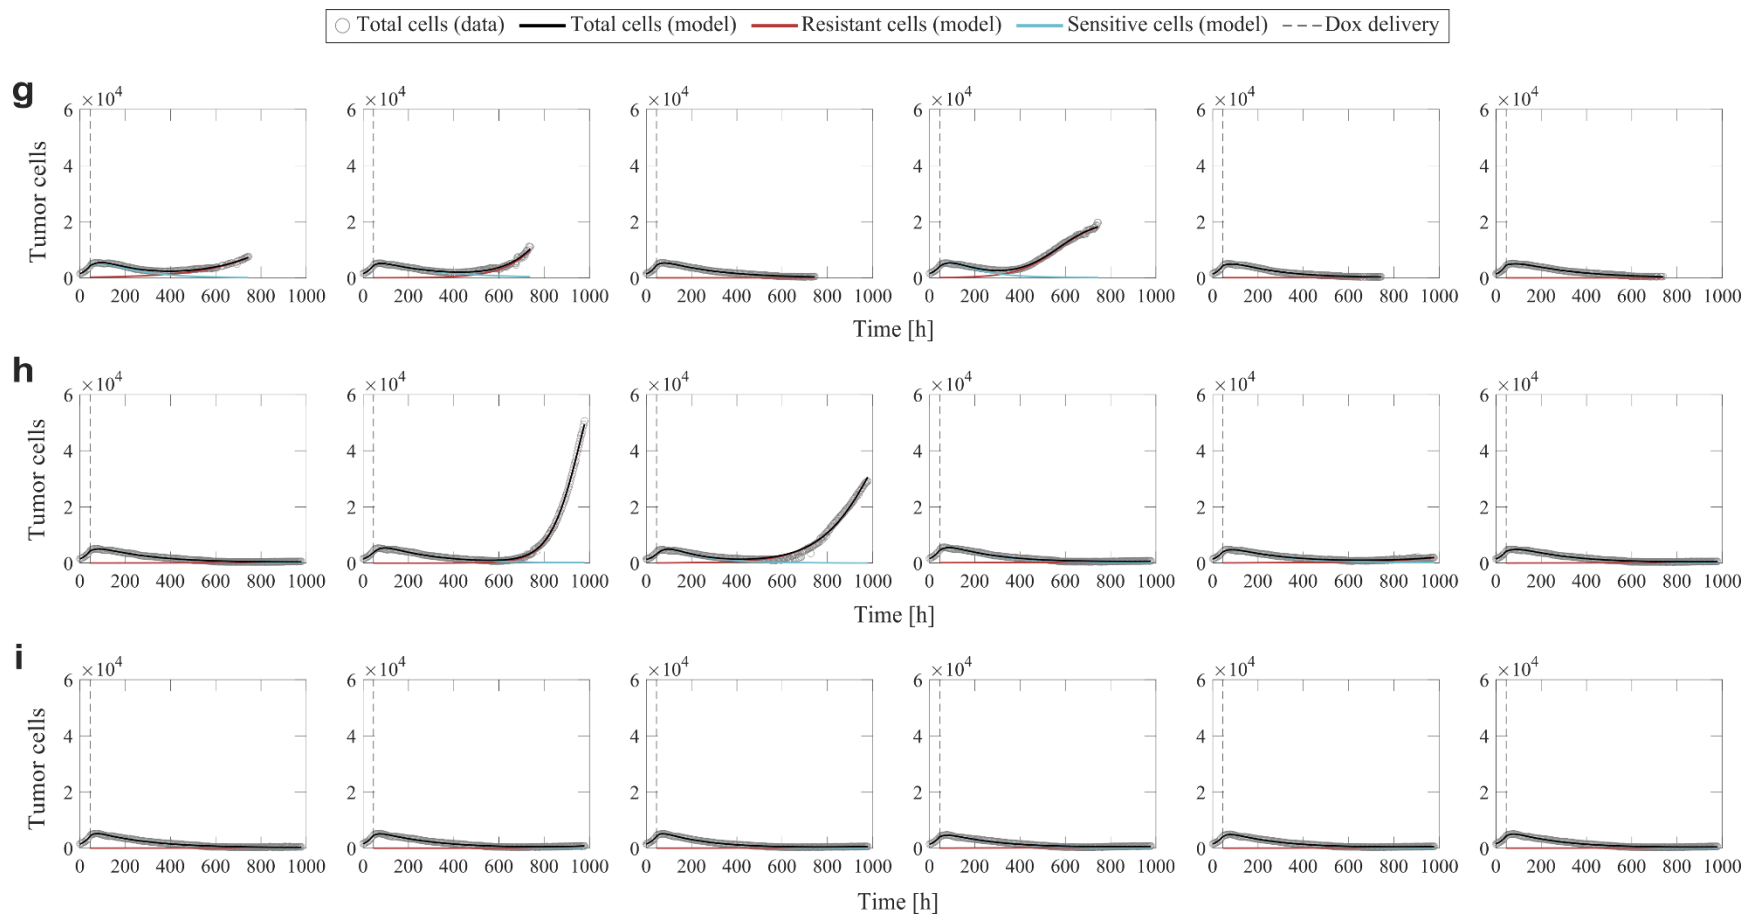

**Supplementary Figure S2 (continued).** Single-dose model fits for all of the time courses resulting from cells treated with a single dose of doxorubicin at concentrations ranging from 10 to 300 nM ( $n = 6$  for each concentration; Experiment 1 in Table 1 of the main text). **(g)** 125 nM; **(h)** 150 nM; **(i)** 300 nM.



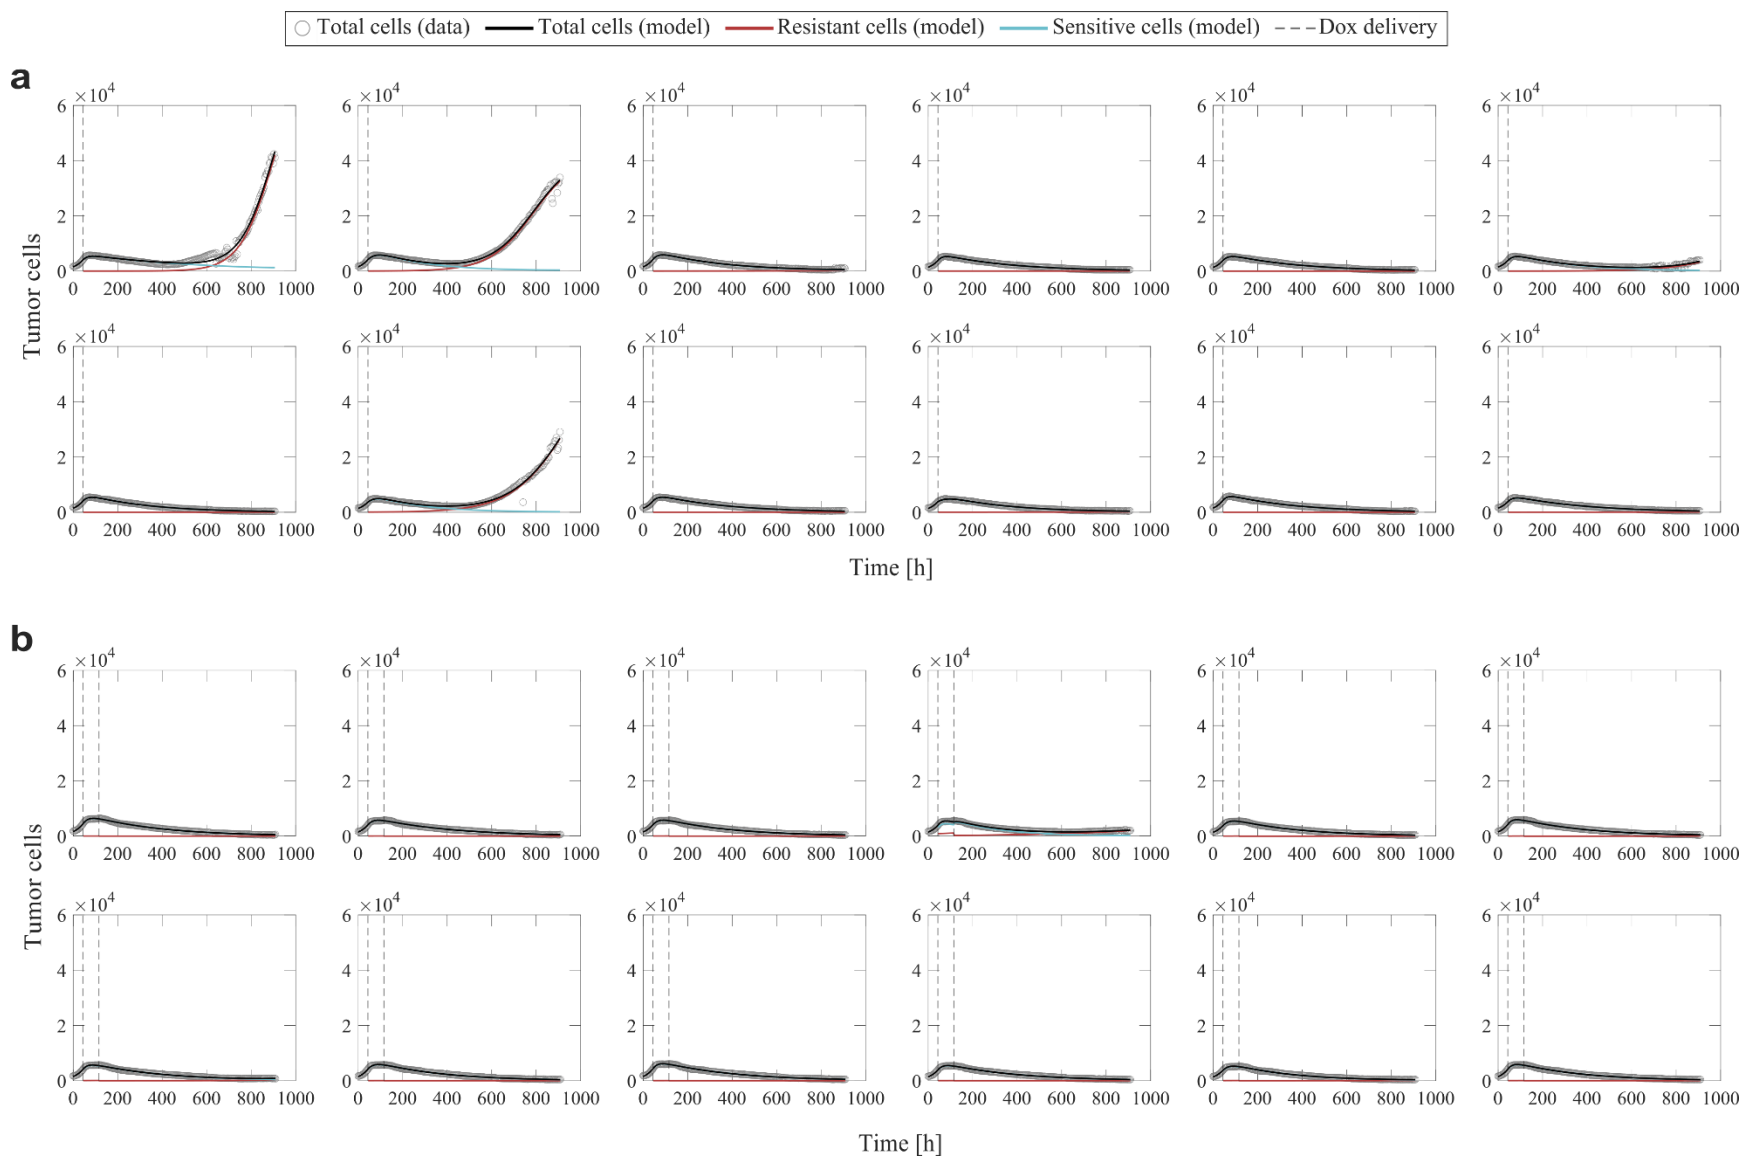

**Supplementary Figure S3.** Multiple-dose model fits for all of the time courses resulting from cells treated with two consecutive doses of 75 nM doxorubicin delivered at varying inter-treatment intervals ( $n = 12$  for each interval; Experiment 2 in Table 1 of the main text). **(a)** 0 days; **(b)** 2 days. For **(a)-(d)**, the multiple-dose model with constant parameters was used to fit the datasets, while for **(e)-(i)**, the multiple-dose model with varying  $f_r$  and  $\gamma_d$  was used.

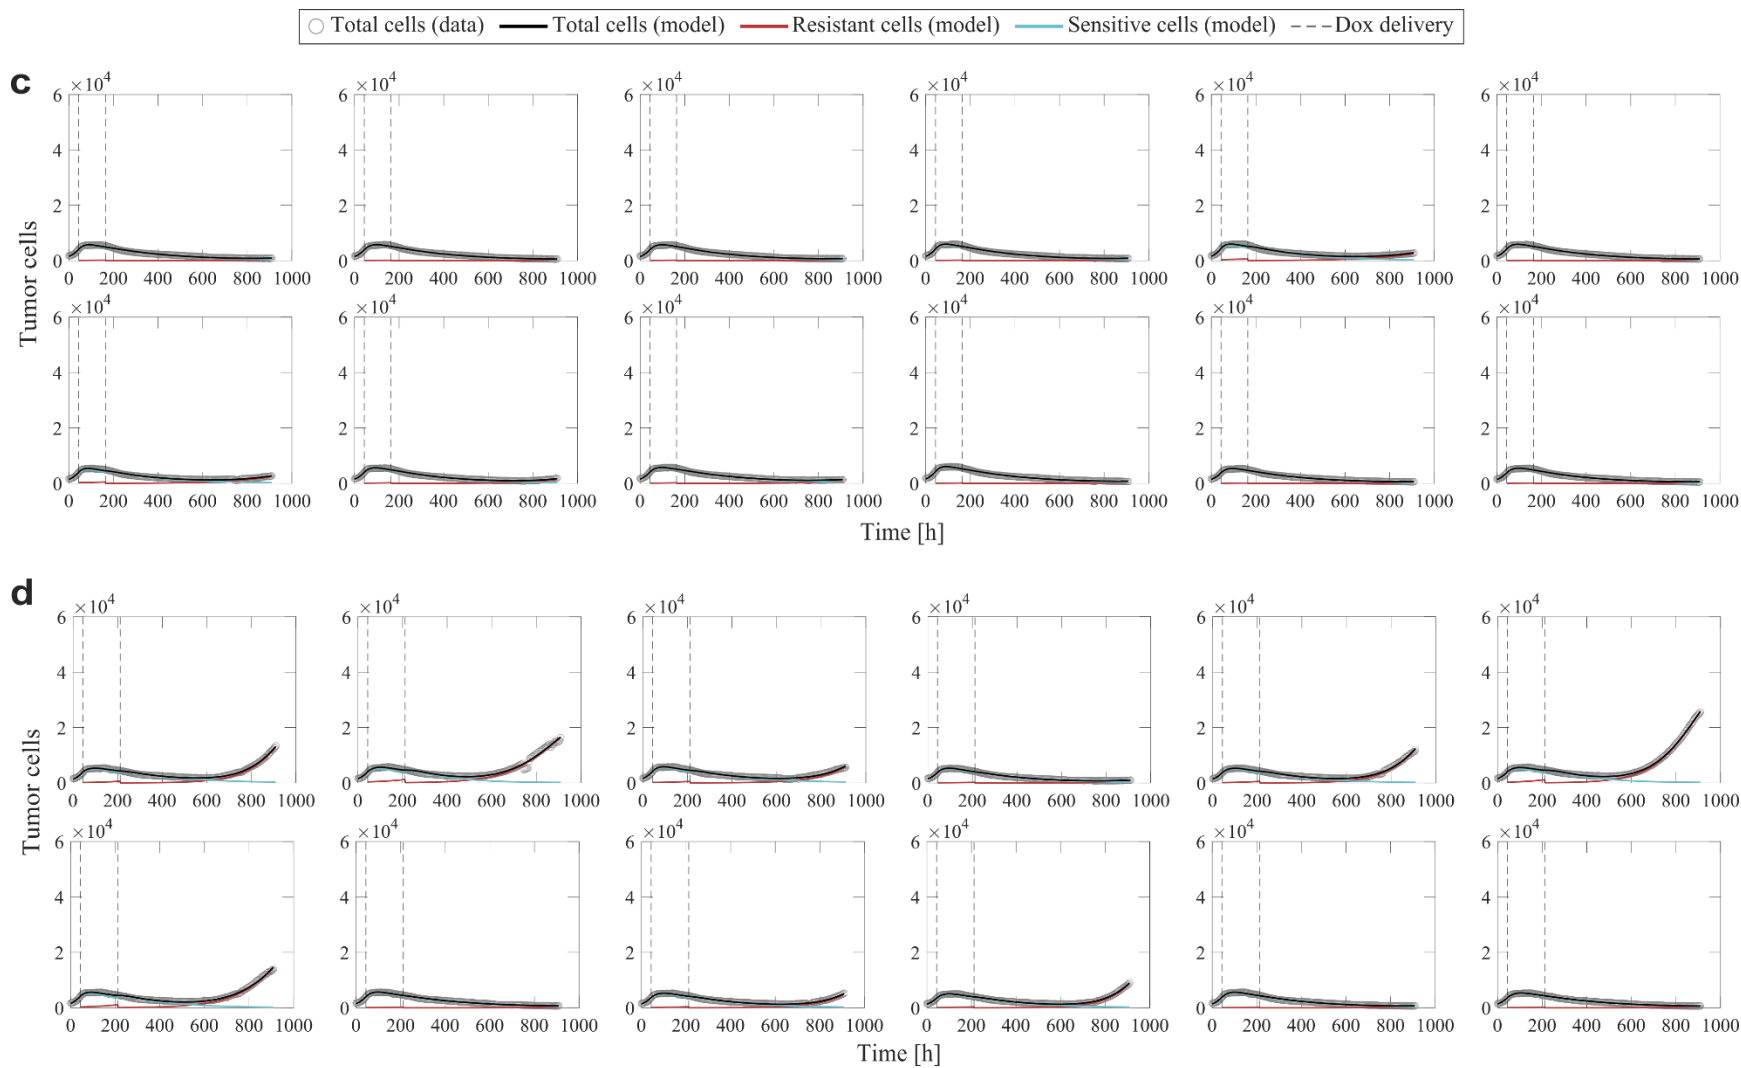

**Supplementary Figure S3 (continued).** Multiple-dose model fits for all of the time courses resulting from cells treated with two consecutive doses of 75 nM doxorubicin delivered at varying inter-treatment intervals ( $n = 12$  for each interval; Experiment 2 in Table 1 of the main text). (c) 4 days; (d) 6 days. For (a)-(d), the multiple-dose model with constant parameters was used to fit the datasets, while for (e)-(i), the multiple-dose model with varying  $f_r$  and  $\gamma_d$  was used.

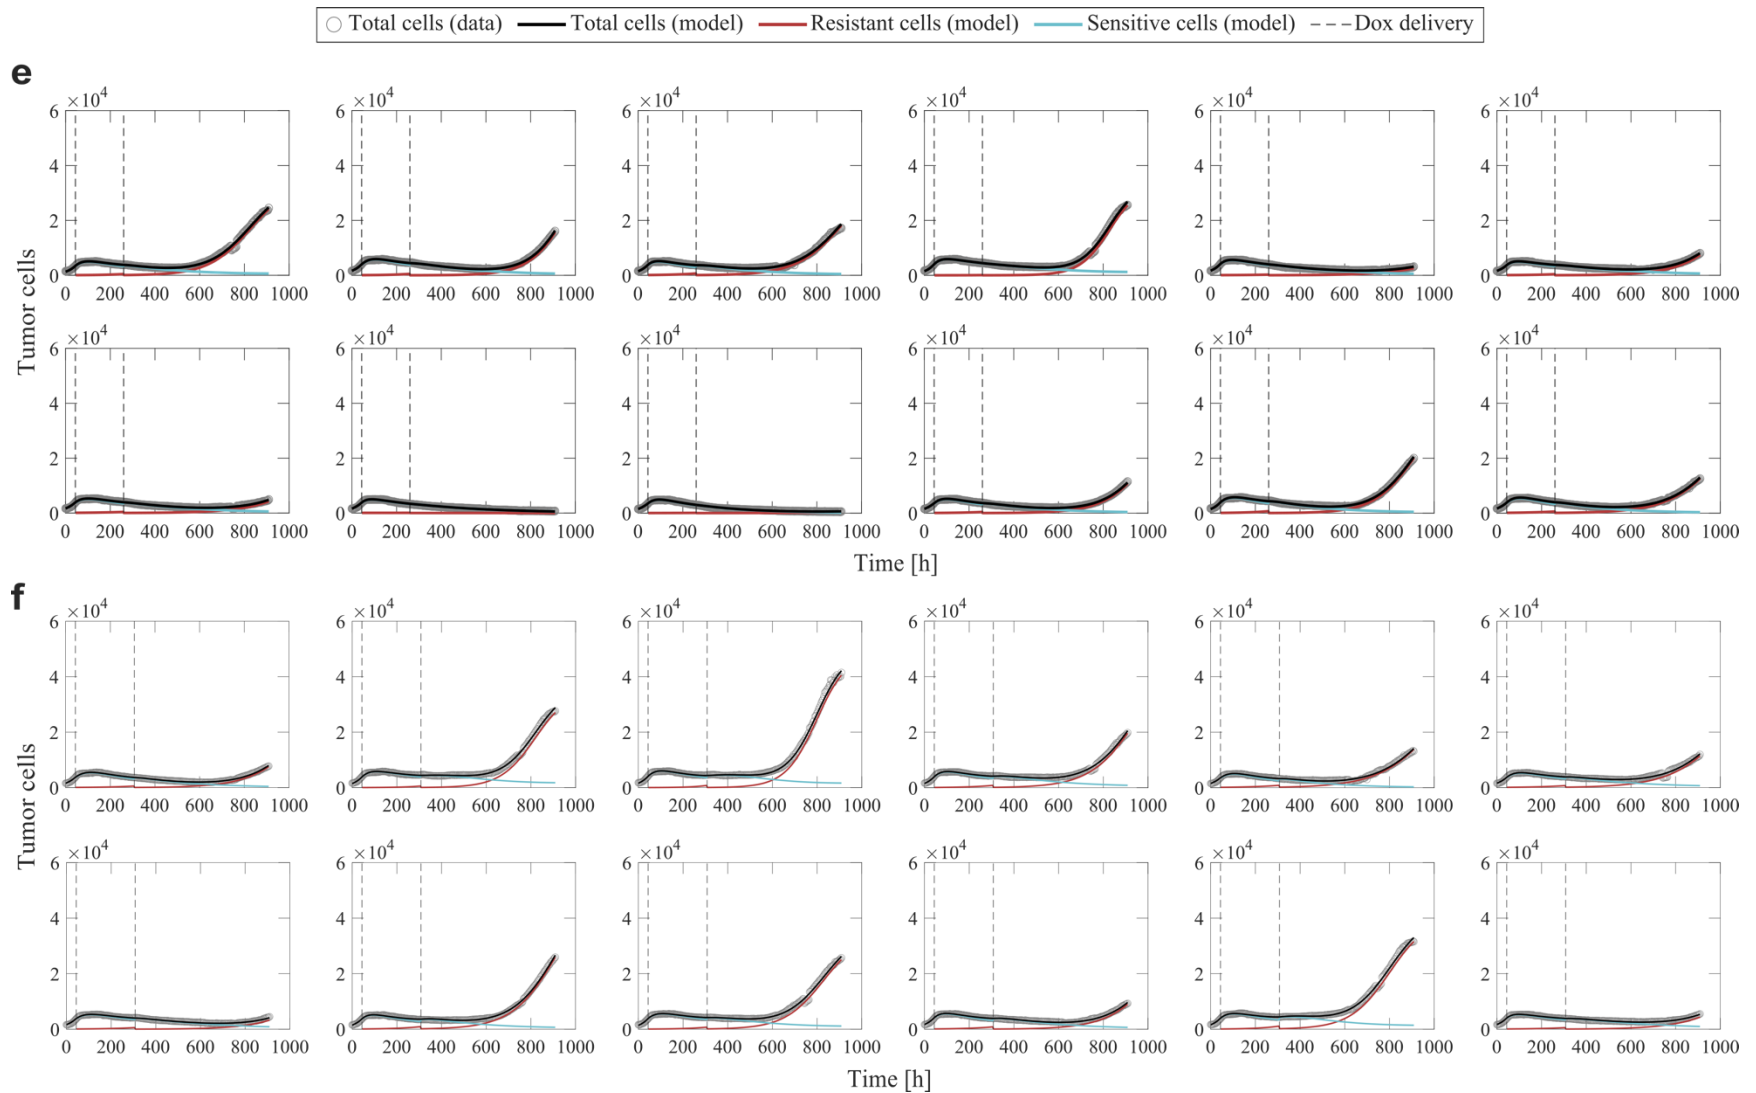

**Supplementary Figure S3 (continued).** Multiple-dose model fits for all of the time courses resulting from cells treated with two consecutive doses of 75 nM doxorubicin delivered at varying inter-treatment intervals ( $n = 12$  for each interval; Experiment 2 in Table 1 of the main text). (e) 8 days; (f) 10 days. For (a)-(d), the multiple-dose model with constant parameters was used to fit the datasets, while for (e)-(i), the multiple-dose model with varying  $f_r$  and  $\gamma_d$  was used.

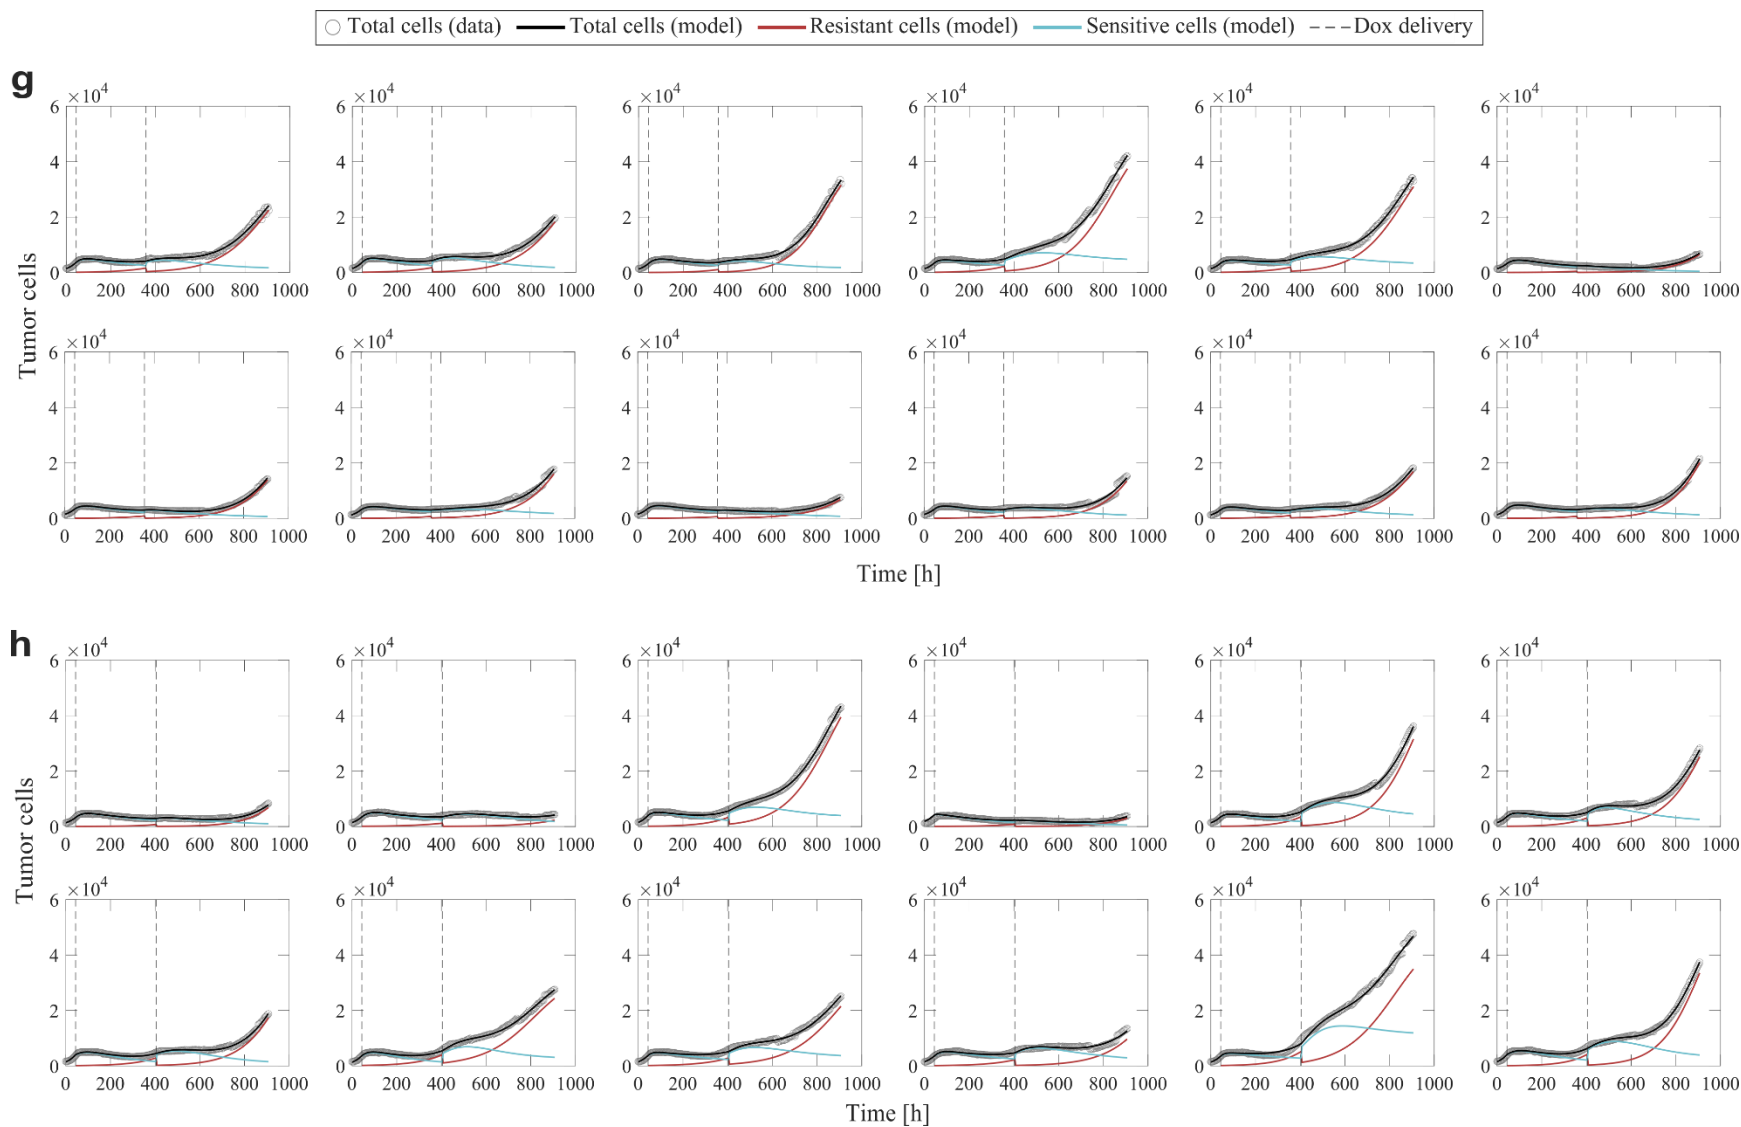

**Supplementary Figure S3 (continued).** Multiple-dose model fits for all of the time courses resulting from cells treated with two consecutive doses of 75 nM doxorubicin delivered at varying inter-treatment intervals ( $n=12$  for each interval; Experiment 2 in Table 1 of the main text). **(g)** 12 days; **(h)** 14 days. For **(a)-(d)**, the multiple-dose model with constant parameters was used to fit the datasets, while for **(e)-(i)**, the multiple-dose model with varying  $f_r$  and  $\gamma_d$  was used.

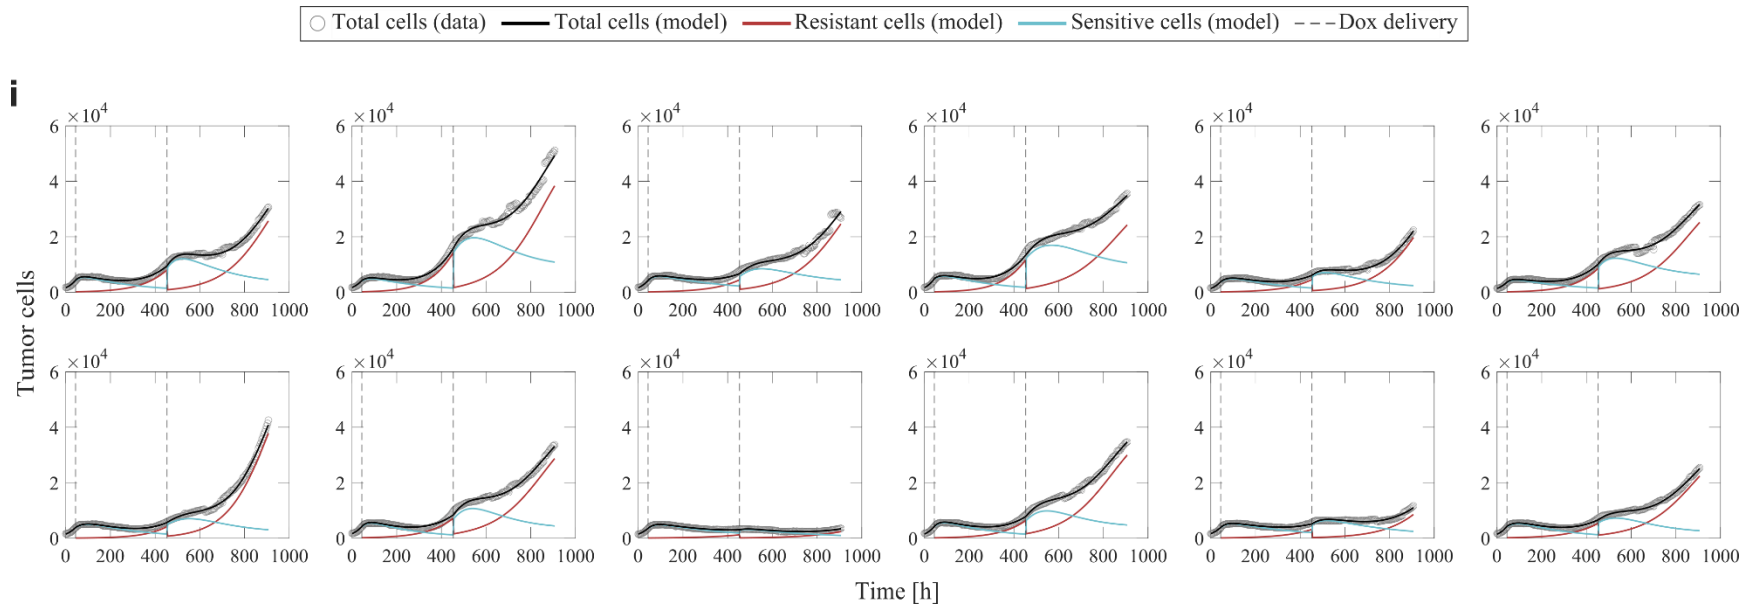

**Supplementary Figure S3 (continued).** Multiple-dose model fits for all of the time courses resulting from cells treated with two consecutive doses of 75 nM doxorubicin delivered at varying inter-treatment intervals ( $n=12$  for each interval; Experiment 2 in Table 1 of the main text). **(i)** 16 days. For **(a)-(d)**, the multiple-dose model with constant parameters was used to fit the datasets, while for **(e)-(i)**, the multiple-dose model with varying  $f_r$  and  $\gamma_d$  was used.

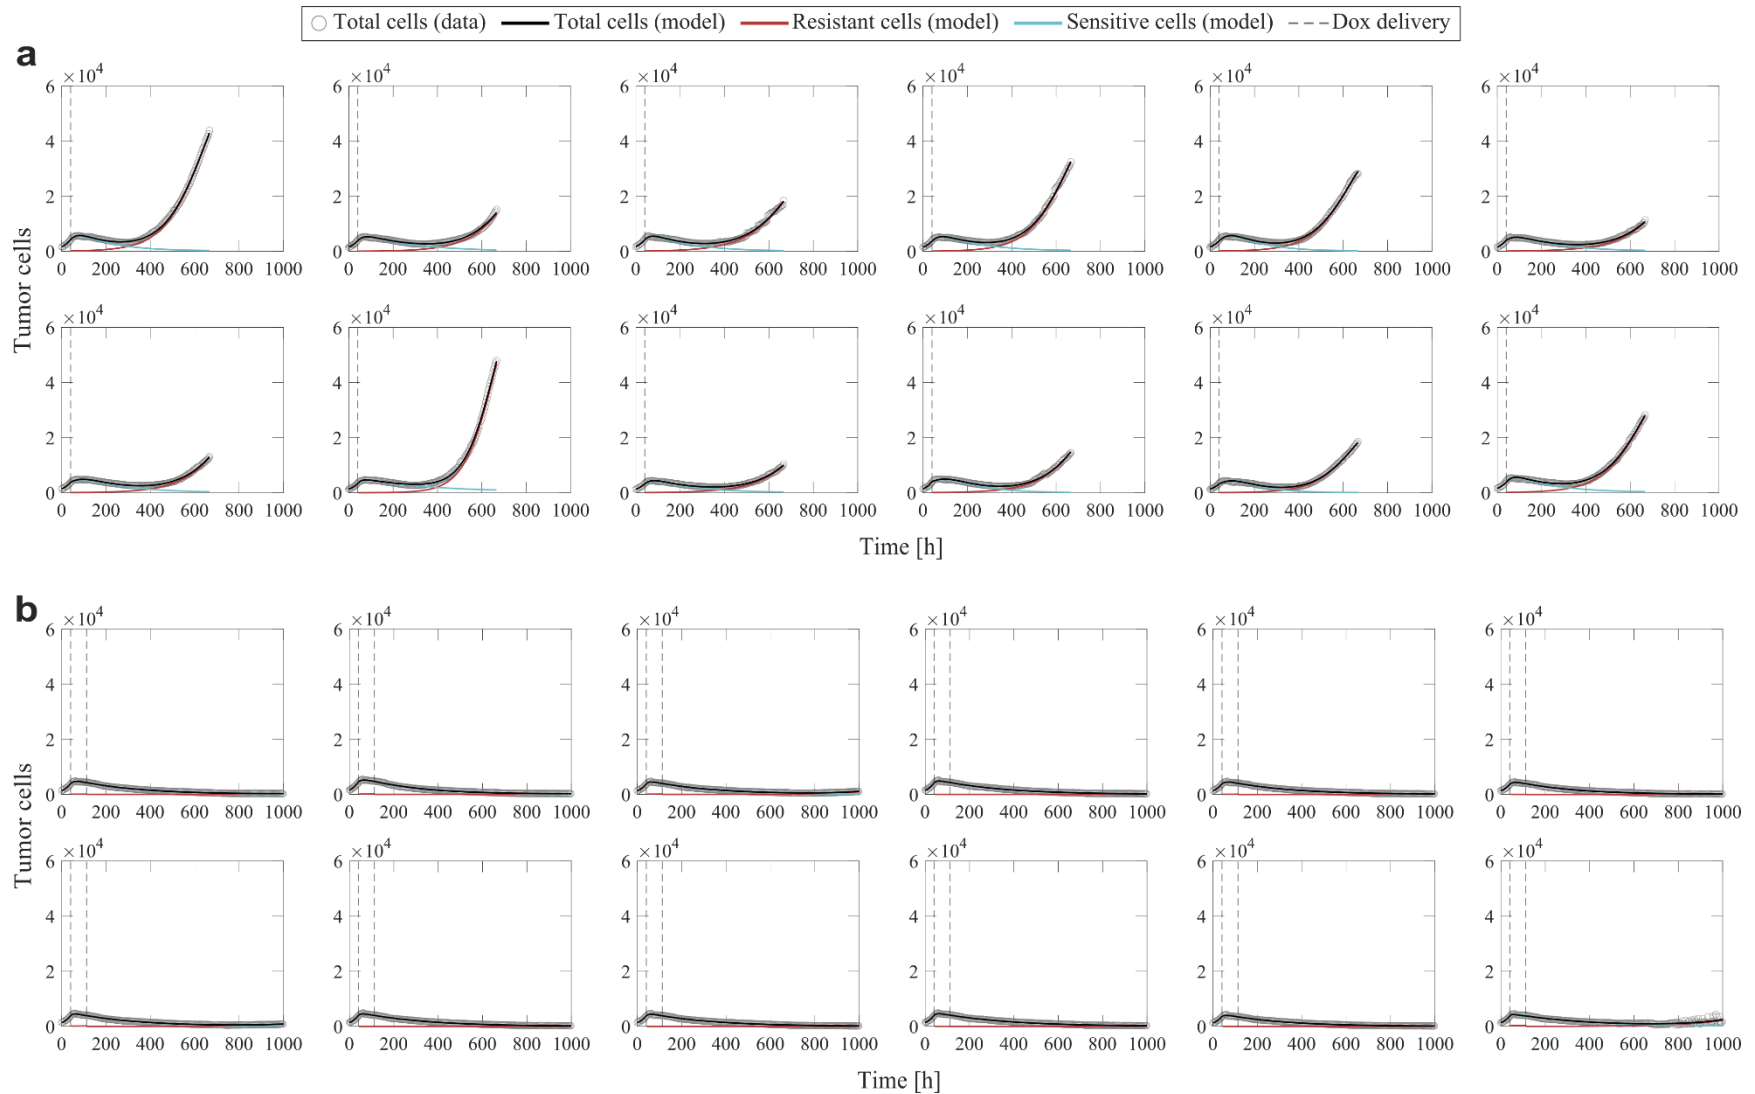

**Supplementary Figure S4.** Multiple-dose model fits for all of the time courses resulting from cells treated with a varying number of 75 nM doxorubicin doses delivered at 2-day inter-treatment intervals ( $n = 12$  for each total dose number; Experiment 3 in Table 1 of the main text). **(a)** 1 dose; **(b)** 2 doses. The multiple-dose model with constant parameters was used to fit the datasets.

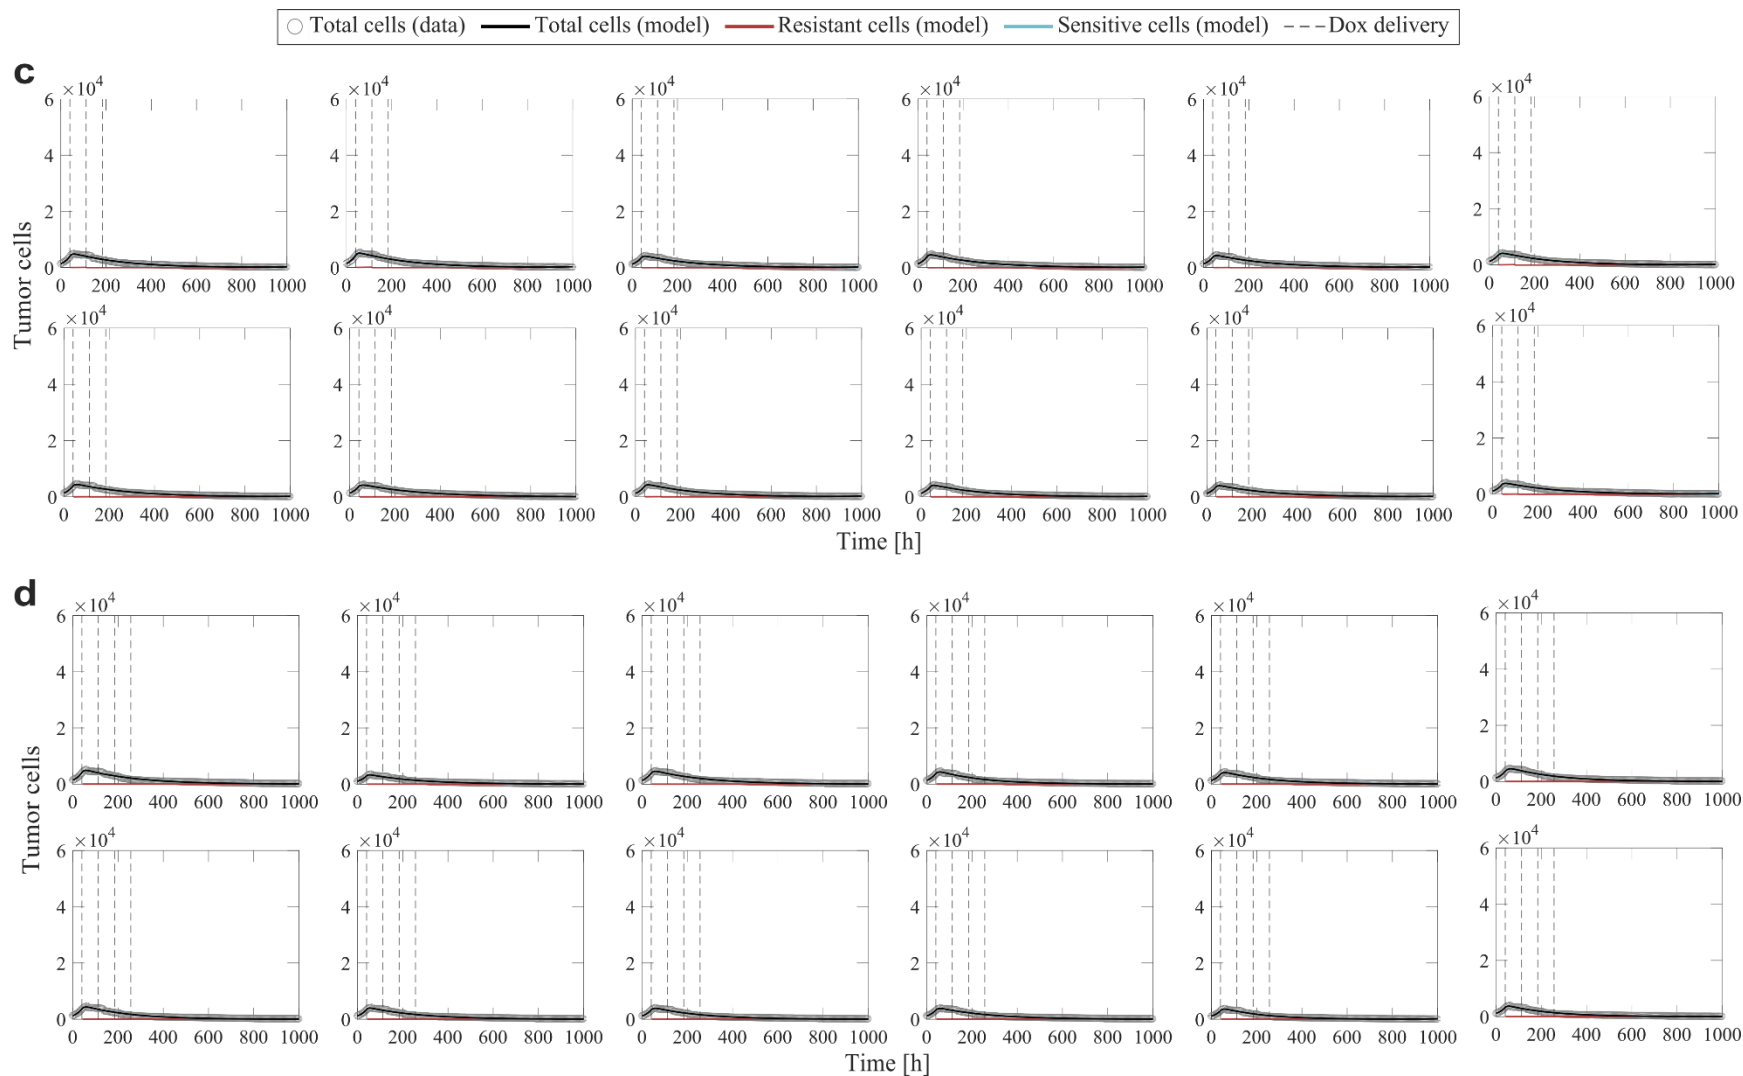

**Supplementary Figure S4 (continued).** Multiple-dose model fits for all of the time courses resulting from cells treated with a varying number of 75 nM doxorubicin doses delivered at 2-day inter-treatment intervals ( $n = 12$  for each total dose number; Experiment 3 in Table 1 of the main text). (c) 3 doses; (d) 4 doses. The multiple-dose model with constant parameters was used to fit the datasets.

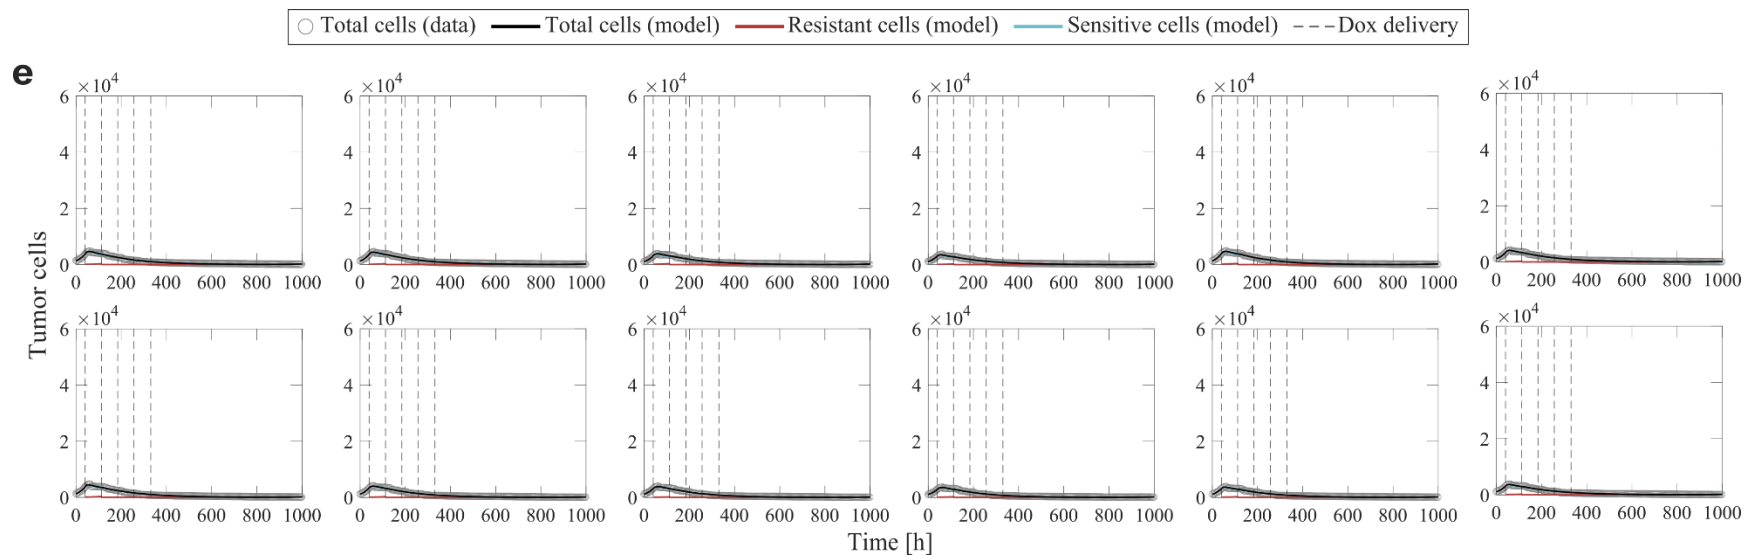

**Supplementary Figure S4 (continued).** Multiple-dose model for all of the time courses resulting from cells treated with a varying number of 75 nM doxorubicin doses delivered at 2-day inter-treatment intervals ( $n = 12$  for each total dose number; Experiment 3 in Table 1 of the main text). **(e)** 5 doses. The multiple-dose model with constant parameters was used to fit the datasets.



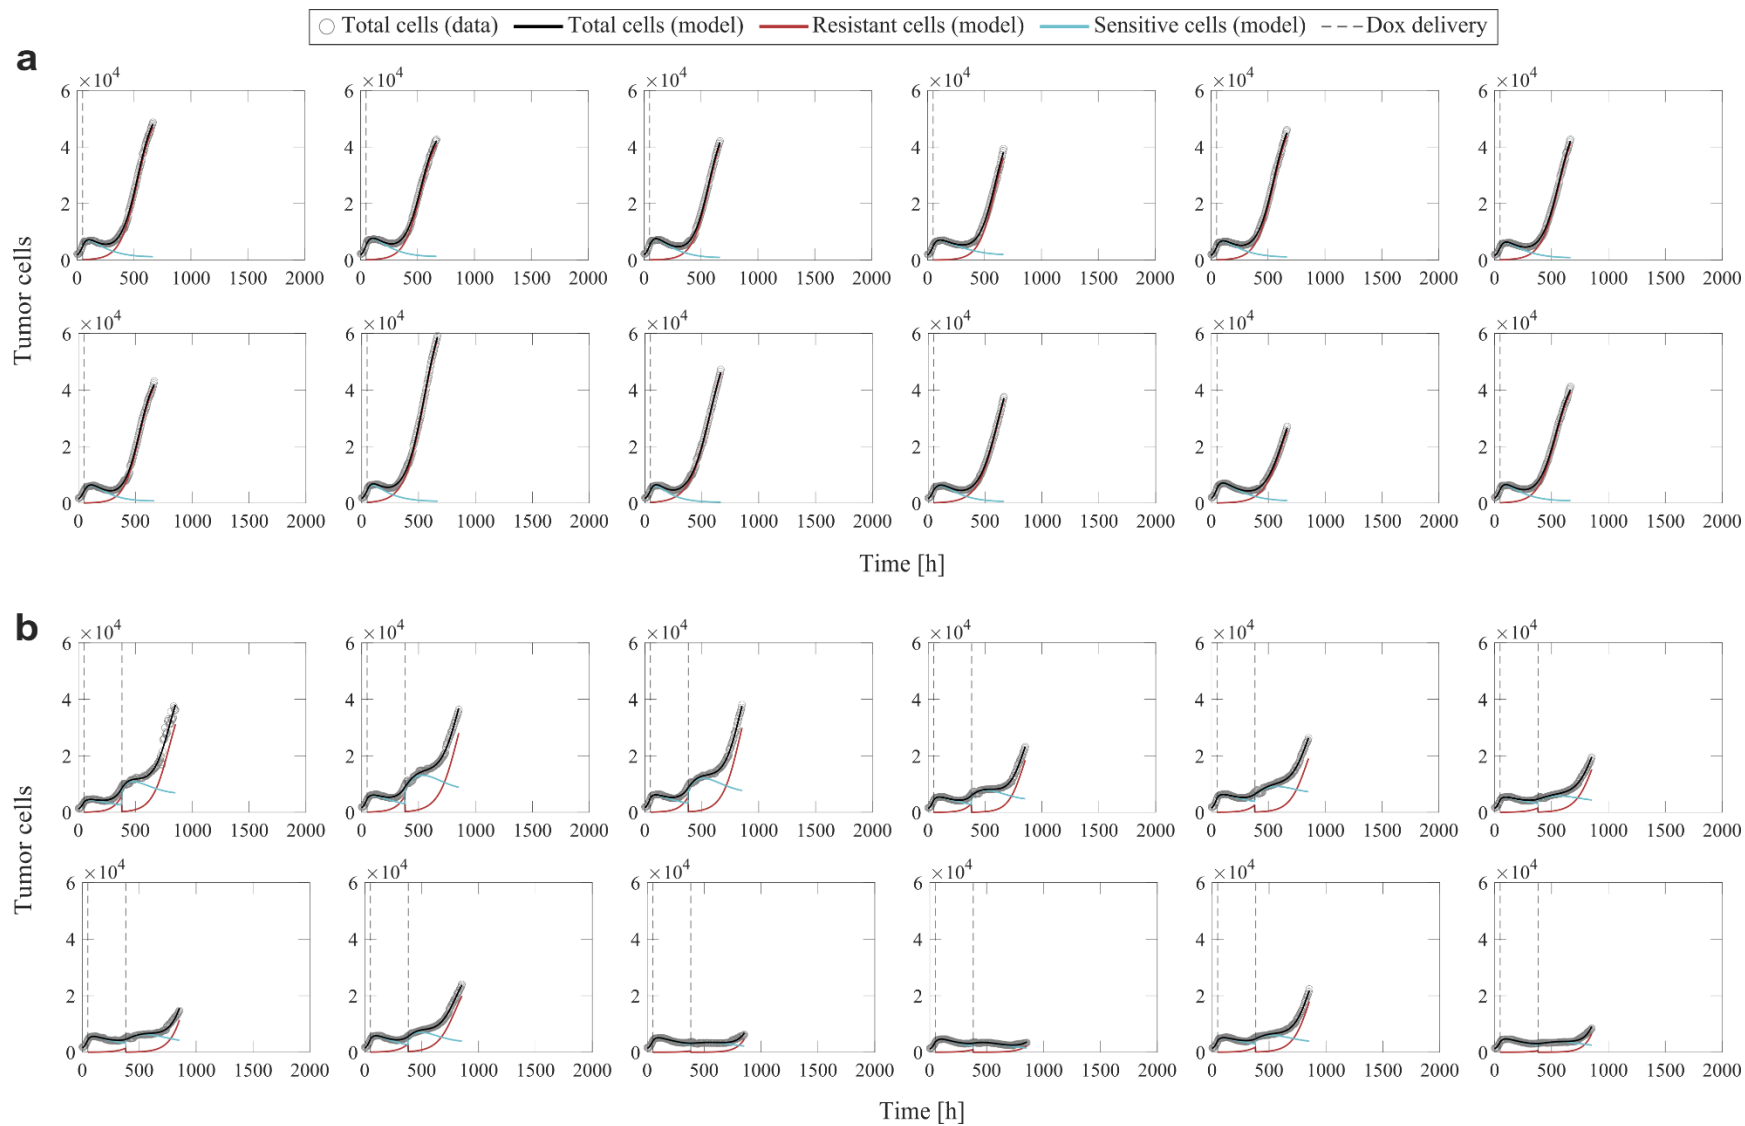

**Supplementary Figure S5.** Multiple-dose model fits for all of the time courses resulting from cells treated with a varying number of 75 nM doxorubicin doses delivered at 2-week inter-treatment intervals ( $n = 12$  for each total dose number; Experiment 3 in Table 1 of the main text). **(a)** 1 dose; **(b)** 2 doses. The multiple-dose model with varying  $f_r$  and  $\gamma_d$  was used to fit the datasets.

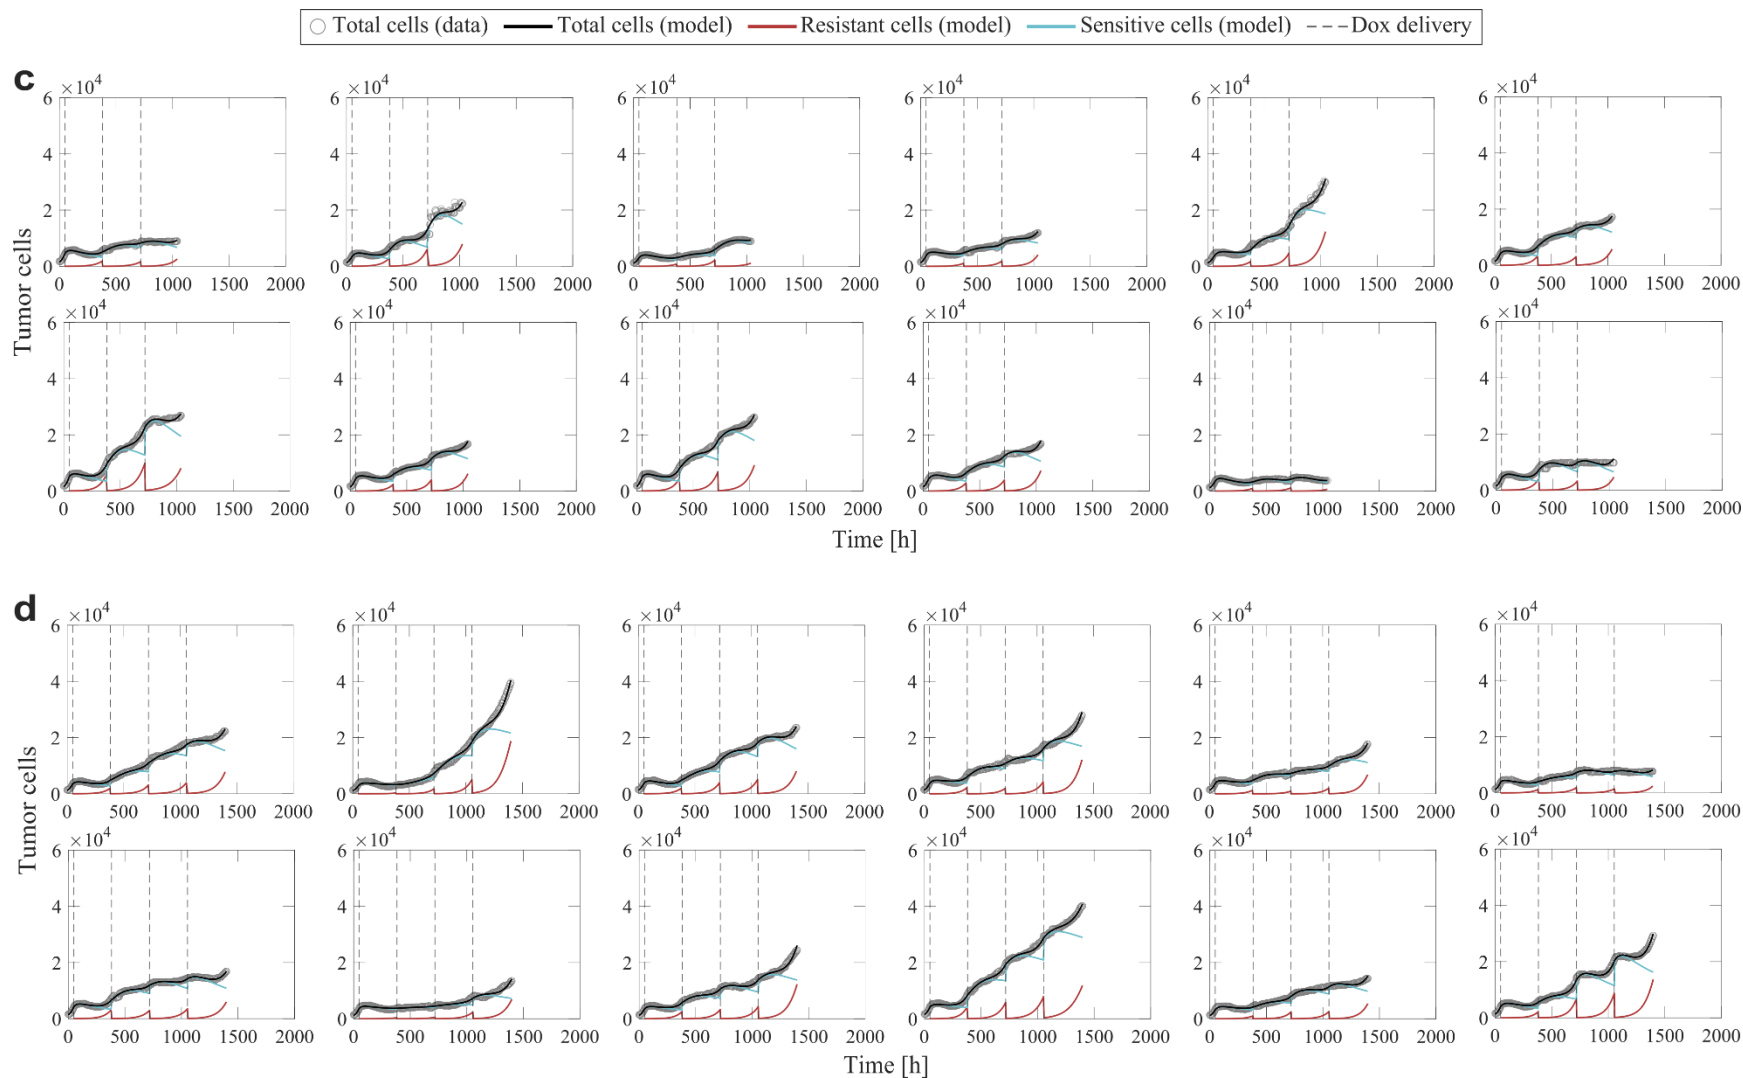

**Supplementary Figure S5 (continued).** Multiple-dose model fits for all of the time courses resulting from cells treated with a varying number of 75 nM doxorubicin doses delivered at 2-week inter-treatment intervals ( $n = 12$  for each total dose number; Experiment 3 in Table 1 of the main text). (c) 3 doses; (d) 4 doses. The multiple-dose model with varying  $f_r$  and  $\gamma_d$  was used to fit the datasets.

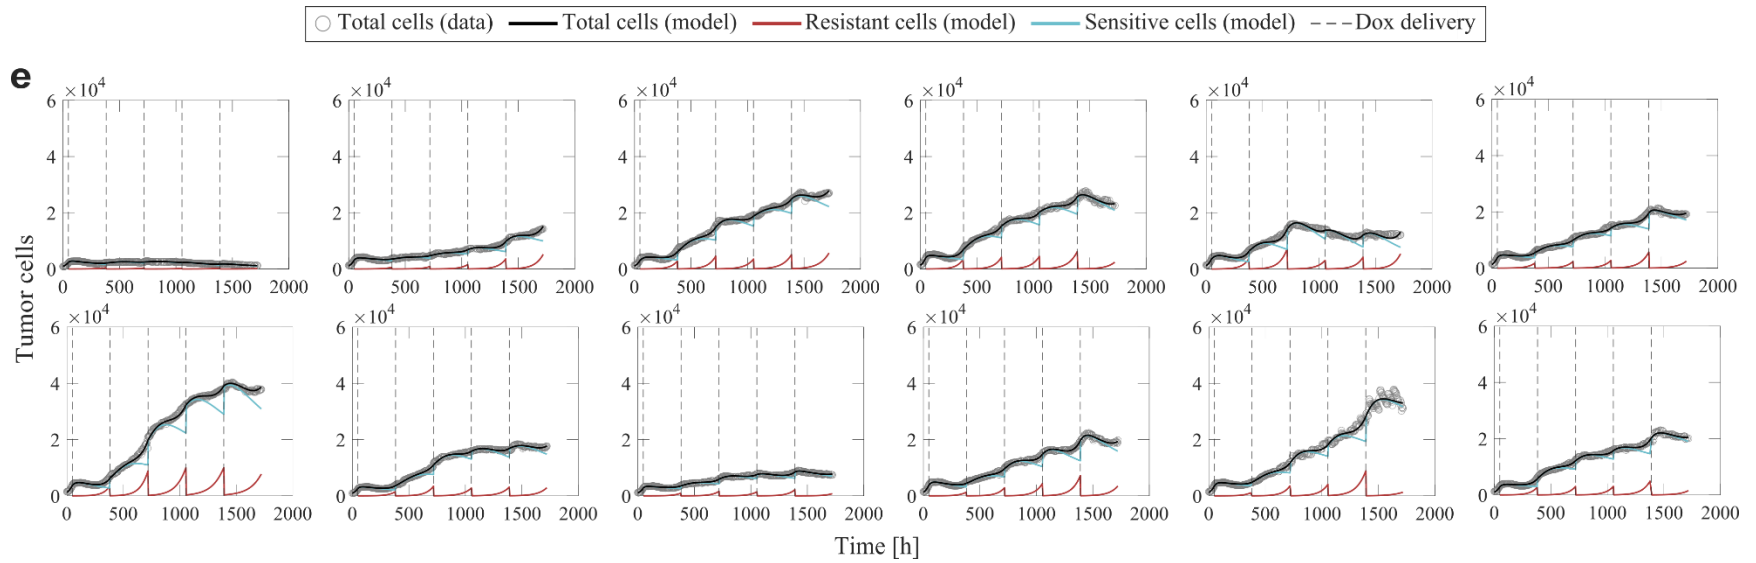

**Supplementary Figure S5 (continued).** Multiple-dose model fits for all of the time courses resulting from cells treated with a varying number of 75 nM doxorubicin doses delivered at 2-week inter-treatment intervals ( $n = 12$  for each total dose number; Experiment 3 in Table 1 of the main text). (e) 5 doses. The multiple-dose model with varying  $f_r$  and  $\gamma_d$  was used to fit the datasets.
